# 1 **Structure-based Design of CDC42 Effector Interaction Inhibitors For** 2 **the Treatment of Cancer**

3  
4 Sohail Jahid<sup>1\*</sup>, Jose A. Ortega<sup>2\*</sup>, Linh M. Vuong<sup>1\*</sup>, Isabella Maria Acquistapace,<sup>2</sup> Stephanie J.  
5 Hachey<sup>5</sup>, Jessica L. Flesher<sup>4</sup>, Maria Antonietta La Serra<sup>2</sup>, Nicoletta Brindani<sup>2</sup>, Giuseppina La  
6 Sala<sup>2</sup>, Jacopo Manigrasso<sup>2</sup>, Jose M. Arencibia<sup>2</sup>, Sine Mandrup Bertozzi<sup>3</sup>, Maria Summa<sup>3</sup>, Rosalia  
7 Bertorelli<sup>3</sup>, Andrea Armirotti<sup>3</sup>, Rongsheng Jin<sup>5</sup>, Zheng Liu<sup>5</sup>, Chi-Fen Chen<sup>1</sup>, Robert Edwards<sup>6</sup>,  
8 Christopher C.W. Hughes<sup>7</sup>, Marco De Vivo<sup>2+</sup>, Anand K. Ganesan<sup>1,4+</sup>

9  
10 <sup>1</sup>Department of Dermatology, University of California, Irvine, Irvine, CA; <sup>2</sup>Laboratory of  
11 Molecular Modeling and Drug Design, Istituto Italiano di Tecnologia, Via Morego 30, 16163,  
12 Genoa, Italy; <sup>3</sup>Analytical Chemistry and Translational Pharmacology, Istituto Italiano di  
13 Tecnologia, Via Morego 30, 16163, Genoa, Italy; <sup>4</sup>Department of Biological Chemistry,  
14 University of California, Irvine, Irvine, CA; <sup>5</sup>Department of Physiology and Biophysics,  
15 University of California, Irvine, Irvine, CA; <sup>6</sup>Department of Pathology and Lab Medicine,  
16 University of California, Irvine, Irvine, CA; <sup>7</sup>Department of Molecular Biology and Biochemistry,  
17 University of California, Irvine, Irvine, CA.

18  
19 \*These authors contributed equally to experimental work

20 <sup>+</sup>These collaborating senior authors equally contributed to study design, data analysis, and  
21 manuscript preparation

22

23

24 **SUMMARY**

25 CDC42 family GTPases (RHOJ, RHOQ, CDC42) are upregulated but rarely mutated in cancer  
26 and control both the ability of tumor cells to invade surrounding tissues and the ability of  
27 endothelial cells to vascularize tumors. Here we use computer-aided drug design to discover a new  
28 chemical entity (ARN22089) that targets CDC42 GTPases and blocks CDC42 effector interactions  
29 without affecting the binding between closely related GTPases (RAC1, RAS, RAL) and their  
30 downstream effectors. Our lead compound has broad activity against a panel of cancer cell lines,  
31 inhibits S6 phosphorylation and MAPK activation, activates pro-inflammatory and apoptotic  
32 signaling, and blocks tumor growth and angiogenesis in three-dimensional vascularized  
33 microtumor models (VMT) *in vitro*. In addition, ARN22089 has a favorable pharmacokinetic  
34 profile and can inhibit the growth of BRAF mutant mouse melanomas and patient-derived  
35 xenografts *in vivo*. Taken together, this work identifies a promising new class of therapeutic agents  
36 that influence tumor growth by modulating CDC42 signaling in both the tumor cell and its  
37 microenvironment.

38

## 39 INTRODUCTION

40 CDC42 GTPases (RHOJ, RHOQ, CDC42) are linked to multiple human cancers and modulate  
41 cell-cycle progression, tumor cell migration/invasion, and tumor angiogenesis.<sup>1</sup> RHOJ, a known  
42 regulator of melanoma<sup>2</sup>, breast cancer<sup>3</sup>, and gastric cancer<sup>4</sup> progression, activates signaling  
43 cascades in endothelial cells that are required for tumor angiogenesis<sup>5-7</sup> and induces PAK signaling  
44 in tumor cells to promote growth.<sup>2</sup> Similarly, CDC42 is a critical regulator of angiogenic  
45 sprouting<sup>8</sup> and tubulogenesis<sup>9</sup> in endothelial cells and promotes tumor cell proliferation and  
46 migration.<sup>10</sup> In addition, CDC42 and its downstream PAK kinases are regulators of MAPK  
47 inhibitor resistance in BRAF mutant melanoma.<sup>11</sup> Finally, RHOQ, while less studied, is also  
48 known to promote tumor invasion<sup>12</sup> and angiogenesis<sup>13</sup>.

49  
50 The GTPase activity of CDC42 family members is tightly regulated by *i*) guanine nucleotide  
51 exchange factors (GEFs); *ii*) guanine nucleotide dissociation inhibitors (GDIs); and *iii*) GTPase  
52 activating proteins (GAPs).<sup>14</sup> CDC42 activity is also controlled by post-translational modification,  
53 including prenylation, which controls membrane localization.<sup>14</sup> CDC42 family members are  
54 considered “undruggable” due to their globular structure with limited small molecule binding  
55 pockets, and their high affinity for GTP/GDP.<sup>1</sup> Moreover, the tight regulation of CDC42 GTPases  
56 by GEFs, GAPs, and GDIs adds an additional level of complexity to targeting these proteins.  
57 Nonetheless, recent efforts have focused on developing small molecules that inhibit CDC42  
58 signaling. Existing inhibitors block the ability of GEFs to activate RAC/CDC42<sup>15</sup>, prevent  
59 RAC/CDC42 from localizing to membranes<sup>16</sup>, or block RAC/CDC42 GTP binding<sup>17</sup>.  
60 Unfortunately, the efficacy of these strategies is limited by the poor selectivity and/or poor  
61 bioavailability of the inhibitors.<sup>1</sup> Furthermore, as CDC42 and RAC1 have overlapping roles in

62 platelet function<sup>18</sup>, targeting the signaling of both of these GTPases simultaneously often results  
63 in thrombocytopenia *in vivo*<sup>19</sup>. RAC1 also plays an important role in the cardiovascular system,  
64 and targeting RAC1 results in cardiotoxicity.<sup>20</sup> New structure-based targeting strategies are  
65 needed to develop selective drug-like inhibitors that target the CDC42 family without targeting  
66 RAC1 to eliminate potential side effects.

67  
68 Recent pioneering work has identified structural pockets in G12C mutant RAS and developed  
69 inhibitors that can covalently modify and inhibit G12C RAS function.<sup>21,22</sup> While these approaches  
70 can be applied to RAS mutant cancers, they cannot be adapted to target CDC42 as these proteins  
71 are rarely mutated. Here we focus on CDC42 and RHOJ, two CDC42 family members that have  
72 well-defined roles in cancer. Using a CDC42-PAK6 crystal structure (PDBid: 2ODB), we generate  
73 a RHOJ-PAK1 structural homology model and identify a previously unappreciated binding pocket  
74 present only in GTP bound CDC42 and RHOJ. We use structure-based virtual screening and  
75 molecular dynamics simulations<sup>23</sup> to identify a novel class of compounds that block RHOJ and  
76 CDC42 effector interactions, characterize their function *in vitro*, and present proof of principle  
77 data that these compounds inhibit tumor growth *in vivo*.

78

## 79 **RESULTS**

### 80 **Identification of a Drug Binding Pocket Present in GTP bound RHOJ and CDC42.**

81 To identify putative drug binding pockets in CDC42 family GTPases, we first examined the  
82 crystal structure of CDC42 in both its GDP and GTP bound states. When comparing the crystal  
83 structures of GDP-bound CDC42 (PDBid: 1DOA)<sup>24</sup> and GTP-bound CDC42 interacting with the  
84 CRIB domain of PAK6 (PDBid: 2ODB), we discovered a previously unappreciated allosteric

85 pocket at the CDC42-PAK6 protein-protein binding interface that is located on the CDC42 surface  
86 in proximity to Ser71, Arg68 and Tyr64 (**Fig. 1A,B**). Specific residues of the structural motifs  
87 'switch I' (Val36, Phe37) and 'switch II' (Ala59, Tyr64, Leu67, Leu70, Ser71) on the CDC42  
88 surface, define a pocket  $\sim 17$  Å away from the GTP binding site, which accommodates the binding  
89 of Trp40 on PAK6 (**Fig. 1D**). This pocket is conserved across structures of CDC42 in complex  
90 with effectors such as PAK4 (PDBid: 5UPK)<sup>25</sup>, PAK1 (PDBid:1EOA)<sup>26</sup>, and IQGAP  
91 (PDBid:5CJP)<sup>27</sup> - (complete list and structural analyses in **Table S1** and **Fig. S1A,B**). This pocket  
92 is also found to be stable during 500ns-long molecular dynamics (MD) simulations of GTP-bound  
93 CDC42 ( $\text{RMSD}_{\text{pocket}} = 2.06 \pm 0.33$  Å, **Fig. S1C**) and is the largest cavity at this protein-protein  
94 interface (**Fig. S1E,F**).<sup>28</sup> This distal pocket was unfolded in the CDC42-GDP complex (**Fig. 1B**).  
95  
96 Next, we sought to determine whether this same allosteric pocket could be used to target RHOJ  
97 effector interactions. As no crystal structure is available for RHOJ, we built a homology model for  
98 RHOJ to use as receptor for a virtual drug screening campaign. The alignment of RHOJ, CDC42,  
99 and RHOQ sequences revealed local sequence homology in the domains of RHOJ/RHOQ that  
100 interact with its downstream effector PAK, suggesting structural conservation of the pocket (**Fig.**  
101 **1C-E**). We verified that a similar allosteric binding pocket (involving the interaction of Trp103 of  
102 PAK1 with Ser89, Arg86 and Tyr82 of RHOJ)<sup>29</sup> was structurally conserved (**Fig. 1E**) in RHOJ,  
103 and stably maintained through additional 500ns-long MD simulations of GTP-bound RHOJ. We  
104 observed that the overall structural fold of RHOJ was preserved during these simulations  
105 ( $\text{RMSD}_{\text{RHOJ}} = 1.20 \pm 0.14$  Å; **Fig. S1D**), as it was the allosteric pocket ( $\text{RMSD}_{\text{pocket}} = 2.07 \pm 0.27$   
106 Å; **Fig. S1D**). Thus, this allosteric pocket could be targeted to block RHOJ/CDC42 effector

107 interactions, and is structurally distinct from the CDC42 GEF interaction interface and the K-RAS  
108 domains targeted by others (**Fig. S2D-E**).<sup>30</sup>

109

### 110 **Identification of Putative CDC42 Family Effector Interaction Inhibitors**

111 Next we performed a virtual screening campaign of an internal chemical collection of compounds,  
112 which contains a diverse and non-redundant set of ~20,000 molecules, to identify RHOJ/CDC42  
113 effector inhibitors. Initially, we selected 54 promising compounds and experimentally tested their  
114 IC<sub>50</sub>s in SKMel28 melanoma cells - a cell line that we previously determined was sensitive to  
115 RHOJ depletion (**Fig. 2A**).<sup>29</sup> We then selected compounds with IC<sub>50</sub> less than 50 μM (**Table S2**)  
116 for further analyses (those with IC<sub>50</sub> greater than 50 μM are listed in **Table S3**). We first  
117 determined the compounds' ability to inhibit the interaction between RHOJ or CDC42 and its  
118 downstream effector PAK using an established CDC42 interaction assay, which measures the  
119 interaction between RHOJ/CDC42 and the PAK-p21 binding domain (**Fig. S2B**). We also  
120 measured the kinetic solubility of the active compounds to evaluate their potential for further  
121 development. Our initial screening campaign identified ARN12405 as a promising hit (IC<sub>50</sub> of 16.4  
122 μM in SKM28 cell line and high kinetic solubility of 222 μM) that inhibits RHOJ/CDC42-PAK  
123 interactions (**Fig. S2B**). Notably, ARN12405 features a functionalized pyrimidine scaffold bearing  
124 a 3-piperidine, a 4-chloro aniline, and a 4-pyridine, respectively, in the 2, 4 and 6 position (**Fig.**  
125 **2B**). Modeling predicts that ARN12405 fits within the effector pocket of RHOJ and CDC42 (**Fig.**  
126 **S2C**). To further assess the predicted binding poses from our docking results, we performed  
127 molecular dynamics (MD) simulations of both RHOJ and CDC42 in complex with ARN12405.  
128 As shown in **Figure S2F-G, Left panels**, our hit compound steadily binds the target pocket

129 throughout the simulations ( $\text{RMSD}_{\text{ARN12405}} = 2.00 \pm 0.40 \text{ \AA}$  and  $3.24 \pm 0.85 \text{ \AA}$ , for RHOJ- and  
130 CDC42-ligand complexes, respectively).

131  
132 Next we performed hit to lead optimization. We first generated new structural analogues and  
133 determined their  $\text{IC}_{50}$  in five different cancer cell lines (WM3248, SKme13, A375, SW480,  
134 SKM28), as well as kinetic solubility and half-life stability in mouse plasma and in mouse liver  
135 microsomes (**Fig. 2A-C, S2A**, synthesis details in Supplemental Information). First, we simplified  
136 the starting scaffold to identify the more effective chemical features for RHOJ/CDC42 inhibition,  
137 replacing the pyridine heterocycle with a phenyl ring (ARN21698), which slightly increased the  
138 activity ( $\text{IC}_{50}$  6.3-10.94  $\mu\text{M}$ ). Removal or moving the chlorine from para to meta position of the  
139 aniline moiety in position 4 (ARN21699, ARN21700), maintaining 4-pyridine, decreased 2 fold  
140 the activity compared to the hit in SKM28 cells. Next, we explored additional new aniline  
141 substituents while keeping the 3-piperidine heterocycle and the phenyl ring. The replacement of  
142 chlorine in para position in ARN21698 by a methoxy (ARN22097) or a dimethyl amino group  
143 (ARN22093) resulted in a total or partial loss of activity. In contrast, introducing the same  
144 substituents (methoxy and dimethylamino groups) in meta position (ARN22091 and ARN22164)  
145 moderately diminished the activity of the compounds. At this point, we moved the piperidine  
146 nitrogen from position 3 to 4, keeping either a methoxy or a dimethyl amino substituent in meta  
147 position (ARN22090 and ARN22089, respectively – which do not present a chiral center). These  
148 compounds are moderately active inhibitors in SKM28 cells (ARN22090 =  $\text{IC}_{50}$  38.1  $\mu\text{M}$ ,  
149 ARN22089 =  $\text{IC}_{50}$  24.8  $\mu\text{M}$ ). Notably, ARN22089 has a single digit micromolar  $\text{IC}_{50}$  activity  
150 against the more sensitive cell lines that were tested (WM3248, SKMe13, A375, SW480), an  
151 optimal kinetic and thermodynamic solubility (>250  $\mu\text{M}$  and 268  $\mu\text{M}$ , respectively), and a good

152 half-life in mouse plasma (71 minutes) (**Fig. 2C,S5G**). On the considerations of chemical  
153 tractability (synthesis and chirality), inhibitory activity, solubility, and half-life, ARN22089 was  
154 elected our lead compound. Modeling predicts that ARN22089 fits within the effector pocket of  
155 RHOJ and CDC42 (**Fig. 2E,S2D**). For both RHOJ- and CDC42-ARN22089 complexes, the  
156 binding pose is preserved during 500ns-long MD simulations ( $\text{RMSD}_{\text{ARN22089}} = 3.55 \pm 0.62 \text{ \AA}$  and  
157  $2.80 \pm 0.61 \text{ \AA}$ , for RHOJ- and CDC42-ligand complexes, respectively, **Fig. S2F-G, Right panels**).  
158 As a further proof of principle, we examined the ability of the hit compound (ARN12405), of other  
159 compounds in the chemical class defined above (ARN21699, ARN22090, ARN22091,  
160 ARN22164) and of the lead compound ARN22089 to bind to a purified CDC42 fragment. Initial  
161 studies by native mass spectrometry determined that purified CDC42 could be effectively loaded  
162 with GDP (90% efficiency of loading) or with the GTP analog, GppNHp (>98% efficiency of  
163 loading – **Fig. SH-J**). Then, we observed by microscale thermophoresis that our lead ARN22089  
164 binds better to the purified CDC42 as compared to all other compounds in the class (**Fig. 2D**, MST  
165 traces in Supplemental Information **1.8-1.9**), and also when compared to other known CDC42  
166 inhibitors (ZCL278, ML141, R-ketoralac and Casin).<sup>31</sup> Moreover, we found that ARN22089 binds  
167 CDC42 preferentially when the protein is the GppNHp loaded state, confirming our modelling  
168 results.

## 169 170 **ARN22089 is a Selective CDC42 Family Effector Interaction Inhibitor with Anti-Cancer** 171 **Activity**

172 To gain a better appreciation of the anti-cancer activity of ARN22089, we started by determining  
173 the  $\text{IC}_{50}$  of this compound in a panel of 100 cancer cell lines. Fifty-five of 100 cell lines that were  
174 tested had an  $\text{IC}_{50}$  less than  $10 \mu\text{M}$  (**Fig. 3A, Table S4**), demonstrating a broad spectrum of activity



175 against cancer cells derived from many different tissues. Next, we tested whether our compound  
176 was selective for blocking CDC42 family effector interactions in cells. To do this, we tested  
177 whether ARN22089 could inhibit the interactions between RHOJ or CDC42 and its downstream  
178 effector PAK without affecting the interaction between RAC1 and PAK using an established  
179 CDC42 effector assay,<sup>32</sup> which measures the binding between GTPases and their downstream  
180 effectors. In parallel, we performed a similar set of experiments to examine the ability of  
181 ARN22089 to inhibit the interaction between less closely related members of the RAS family and  
182 their downstream effectors.<sup>33</sup> WM3248 cells were treated with the indicated doses of ARN22089,  
183 cell lysates were prepared, incubated with EDTA to strip GTP and GDP, followed by incubation  
184 with GTP or GDP to load the GTPase, and then incubated with PAK1-p21 binding domain (PAK1-  
185 PBD) coupled beads or RAF1-RAS binding domain (RAF1-RBD) coupled beads, which were then  
186 precipitated and interacting proteins were identified by immunoblotting. ARN22089 inhibited the  
187 interaction between RHOJ or CDC42 and PAK1-PBD at 10  $\mu$ M and 50  $\mu$ M concentrations only  
188 when cell lysates were incubated with GTP (**Fig. 3B**). No interactions were detected between  
189 RHOJ or CDC42 and PAK1-PBD when cell lysates were loaded with GDP (**Fig. 3B**), consistent  
190 with previously published work.<sup>2</sup> Notably, ARN22089 did not inhibit the interaction between the  
191 most closely related GTPase RAC1 and PAK1-PBD beads or between RAS or RAL and RAF1-  
192 RBD beads at either the 10  $\mu$ M or 50  $\mu$ M concentrations (**Fig. 3B**), indicating that our lead  
193 compound was selective for CDC42 family members and does not inhibit RAC1, RAS, or RAL  
194 effector interactions. Our hit compound (ARN12405) similarly blocked RHOJ/CDC42 PAK  
195 interaction but not RAC1 PAK interaction (**Fig. S2B**). Taken together, these results indicate that  
196 ARN22089 selectively inhibits CDC42 family effector interactions without disrupting signaling

197 from closely related GTPases (RAC1) that are known to be responsible for the cardiotoxicity  
198 associated with existing inhibitors of this GTPase family.<sup>20</sup>

199

200 To further validate that ARN22089 inhibits CDC42 effector interactions, we examined whether  
201 ARN22089 could inhibit CDC42-PAK interactions in cells. To measure CDC42 effector  
202 interactions in cells, we used a BiFluorescence complementation (BiFC) assay,<sup>34</sup> where CDC42 or  
203 RHOJ was linked to the N-terminus of Venus fluorescence protein (FP) fragment, while PAK1 is  
204 linked to a C terminal Venus FP fragment (**Fig. S3A**). We then measured CDC42/RHOJ PAK  
205 interactions by measuring YFP fluorescence in cells. Initial optimization studies revealed that we  
206 could visualize GFP indicative of CDC42 PAK interactions in cells that expressed constitutively  
207 active (CA) forms of RHOJ/CDC42 and PAK in the presence but not absence of Doxycycline  
208 (DOX) which induces the transcription of both proteins (**Fig. S3B**). We next determined the  
209 percent intensity of CDC42-PAK interactions using different doses of ARN22089. We observed  
210 that ARN22089 could inhibit CDC42-PAK interaction as measured by our BiFC assay with an  
211 estimated EC<sub>50</sub> of 100 nM (**Fig. 3D, S3C**), consistent with the observation that our hit compound  
212 bound to the CDC42 fragment with comparable affinities to compounds with nanomolar affinities  
213 (**Fig. 2D**).<sup>1</sup> We observed that ARN22089 could inhibit RHOJ/PAK interactions at an approximate  
214 EC<sub>50</sub> between 1-5  $\mu$ M (**Fig. 3E, S3D**), consistent with the IC<sub>50</sub>s observed in cancer cell lines  
215 tested.

216

### 217 **ARN22089 Inhibits MAPK and S6 Phosphorylation and activates NF $\kappa$ B signaling *in vitro***

218 Published studies indicate that CDC42 GTPases are known to activate a spectrum of signaling  
219 cascades. GTP bound CDC42 family GTPases bind to and activate p70S6K.<sup>35</sup> Active p70S6K goes

220 on to phosphorylate the S6 ribosomal protein at two different locations, 234/235 and 240/244.<sup>36</sup>  
221 GTP bound CDC42 family members also activate PAK kinases, whose downstream targets include  
222 members of the MAPK and NFkB pathways.<sup>37</sup> To understand the effect of ARN22089 on cells,  
223 we first sought to examine how drug treatment influenced the activation of kinase signaling  
224 pathways in melanoma cells. WM3248 melanoma cells were treated with 5, 10, or 20  $\mu$ M  
225 ARN22089 for six hours, cell lysates were prepared, and proteins were hybridized with a reverse  
226 phase protein array consisting of 486 antibodies to quantitatively examine how the drug influenced  
227 protein abundance and protein phosphorylation. This analysis revealed that the compounds were  
228 fairly selective, as the abundance of 38 proteins and the phosphorylation of 10 proteins were  
229 significantly affected at both the 10 and/or 20  $\mu$ M doses (**Fig. 4A, Left, Table. S7**). We observed  
230 that ARN22089 could inhibit S6 phosphorylation at both serine 235/236 and 240/244 residues with  
231 both 10 and 20  $\mu$ M doses (**Fig. 4A, lower inset**). We also observed that ARN22089 could  
232 significantly inhibit phosphorylation at the 235/236 sites in both WM3248 and A375 melanoma  
233 cells with 10 and 20  $\mu$ M doses at 6 hours (**Fig. 4B**) and with a dose of 5  $\mu$ M at 24 hours (**Fig. 4B**).  
234 Another phosphorylation event that was inhibited by ARN22089 was MAPK1 (aka ERK). We  
235 observed that ARN22089 inhibited ERK phosphorylation with 10 and 20  $\mu$ M doses at 6 hours  
236 (**Fig. 4B**) and with a 5  $\mu$ M dose at 24 hours in A375 and WM3248 cells (**Fig. 4B**). Taken together,  
237 these studies indicate that ARN22089 is a selective inhibitor of S6 and ERK phosphorylation *in*  
238 *vitro*.

239  
240 Next, we sought to take a broader view of the pathways engaged by ARN22089. To approach this,  
241 we treated cells with either 0, 4, or 6  $\mu$ M of ARN22089, harvested the cells, and performed RNA  
242 sequencing to identify transcripts that were up- or down-regulated upon ARN22089 treatment. We

243 observed that ARN22089 treatment induced the expression of genes involved in cell death and  
244 modulated NF $\kappa$ B signaling (**Fig. 4C,D, Table S8**), consistent with the known role of PAK kinases  
245 in regulating NF $\kappa$ B signaling<sup>34</sup>. We showed that the RELB protein level is increased with drug  
246 treatment compared to untreated cells, corroborating our RNA-seq analysis (**Fig. 4E**). Taken  
247 together, these results suggest that ARN22089 inhibits two known CDC42 effector functions-  
248 p70S6K activation and PAK activation.

249

### 250 **ARN22089 Specifically Inhibits Tumor Angiogenesis in 3D Vascularized Microtumors**

251 CDC42 and RHOJ are both known to have specific roles in tumor angiogenesis. To better  
252 understand how ARN22089 impacts tumor angiogenesis, we sought to test the ability of these  
253 compounds to inhibit vessel formation around tumors. Here we utilized a vascularized microtumor  
254 platform (VMT) - a “tumor-on-a-chip” platform - that incorporates human melanoma cells, which  
255 are grown in a 3D extracellular matrix (ECM), and delivers nutrient to the cells via perfused micro-  
256 vessels<sup>38-41</sup> (**Fig. S4A-C**). Each chamber of the VMT were loaded with mCherry endothelial cells,  
257 GFP labeled tumor cells (A375 and WM3248), fibroblasts, and pericytes. After 4 days, these cells  
258 formed a capillary bed that could feed the growing tumor, similar to newly formed vessels *in vivo*  
259 (**Fig. S4D**). Nutrients and drug (ARN22089, FRAX597, vehicle) were perfused into the chamber  
260 from the high pressure “arterial side” and traversed to the tumor through the vascular network  
261 every two days at the indicated doses. The effects of each compound on the number of GFP tumor  
262 cells and the length of endothelial vessels was measured. Treatment of VMTs at a concentration  
263 of 2  $\mu$ M ARN22089 inhibited the growth of both A375 cells and the mCherry labeled blood vessels  
264 around the tumor (**Fig. 5A**). In contrast, 2  $\mu$ M FRAX597 did not significantly inhibit the growth  
265 of the A375 cells or the blood vessels (**Fig. 5A**). These findings were confirmed in WM3248 cells

266 in which a dose of 2  $\mu\text{M}$  ARN22089 caused significant tumor and vessel regression compared to  
267 both control and FRAX treated VMT (**Fig. 5B**). These observations indicate that ARN22089  
268 inhibits both tumor growth and angiogenesis.

269  
270 Next, we sought to more closely examine whether ARN22089 was a specific inhibitor of tumor  
271 angiogenesis. We generated VMTs that contained A375 cells and endothelial cells and VMOs  
272 (vascularized micro-organs) that contained vessels but no tumor cells. We observed that  
273 ARN22089 could inhibit the growth of both tumor cells and vessels in VMTs at a 600 nM and 2  
274  $\mu\text{M}$  doses, significantly more effective than the angiogenesis inhibitor linifanib (**Fig. 5C**). In  
275 contrast, ARN22089 did not inhibit the growth of VMOs (**Fig. 5D**). We observed that linifanib, in  
276 contrast, did inhibit angiogenesis in VMOs (**Fig. 5D**). These results suggest that ARN22089  
277 specifically inhibits tumor and not normal angiogenesis, consistent with the selective role of the  
278 CDC42 family member RHOJ in tumor angiogenesis.<sup>6</sup>

279

### 280 **ARN22089 Has Drug-Like Properties and Inhibits Tumor Growth *in vivo***

281 Once we determined that our RHOJ/CDC42 interaction inhibitor had a broad spectrum of activity  
282 *in vitro*, we next determined whether it has drug-like properties. First, we verified that ARN22089  
283 has no significant off-target effects as agonist or antagonist for a panel of 47 classical  
284 pharmacological targets, even at concentrations up to 25  $\mu\text{M}$  (**Fig. S5A-E**). Notably, ARN22089  
285 does not target the hERG channel (**Fig. S5C**), which in other cases has been an impediment in  
286 developing safe drugs.<sup>42</sup> We then determined the pharmacokinetics of ARN22089 in experimental  
287 animals after intraperitoneal, intravenous, and oral administration (**Fig. 6A**). The compound was  
288 well tolerated in experimental animals and had drug-like PK properties (**Fig. 6A, S5F**). In addition,

289 we incubated the compound with both human and rat liver microsomes and determined that the  
290 compound had a half-life of 107 minutes after incubation with rat microsomes and 510 minutes  
291 after incubation with human microsomes (**Fig. S5G**).

292  
293 To test the efficacy of the compound *in vivo*, we first induced BRAF mutant melanoma tumors  
294 with topical tamoxifen in *Tyrosinase::CreERT2; Braf<sup>CA/+</sup>; Pten<sup>fl/fl</sup>; RhoJ<sup>+/+</sup>* animals at P21<sup>2</sup>, and  
295 treated the mice with ARN22089 for 10 days using a BID, IP dosing regimen. Inhibitor treatment  
296 prolonged the survival of tumor carrying mice (mean survival: control 51.5, treated 68.5) (**Fig. 6B**)  
297 after only 10 days of treatment. Once we had established that this compound could inhibit the  
298 growth of mouse tumors in immunocompetent mice, we next examined the ability of this  
299 compound to inhibit the growth of patient-derived xenografts (PDXs) in NOD scid gamma (NSG)  
300 mice. Animals were inoculated with PDX tumors, and tumor treatment was initiated after tumors  
301 reached a size of 150-200 mm<sup>3</sup>. Animals were treated with 10 mg/kg IP BID for two weeks, after  
302 which tumors were allowed to continue to grow until they reached endpoint (1500-2000 mm<sup>3</sup>).  
303 The compound significantly inhibited the growth of 2/5 PDX tumors tested as measured by %  
304 tumor growth inhibition and generally inhibited the growth of 4/5 of the tumors tested (**Fig.**  
305 **6C,S6A**). Interestingly, the PDX models tested included one PDX model that was derived from a  
306 patient which had failed both a BRAF inhibitor and immunotherapy, also responded to the  
307 treatment (**Fig. S6B**). Histologic evaluation of treated tumors revealed that ARN22089 treatment  
308 for 2 weeks increased the amount of tumor necrosis in three of the four tumors that responded to  
309 drug (**Fig. S6C,D**). To gauge the effects of long-term ARN22089 treatment on tumor growth, we  
310 inoculated mice with one BRAF mutant PDX that was known to have consistent growth properties,  
311 and began treating the mice with ARN22089 with 0, 10 mg/kg, or 25 mg/kg IV BIW until control

312 tumors reached endpoint. ARN22089 inhibited tumor growth in a dose responsive manner, without  
313 modulating weight of mice (**Fig. 6D,S6E**). We harvested tumors treated at the 0 and 25 mg/kg IV  
314 dose and harvested RNA from tumors. RNA-seq analysis of tumors revealed that ARN22089  
315 treatment modulated NF $\kappa$ B signaling in 25 mg/kg IV treated tumors, as was observed in *in vitro*  
316 treated cells (**Fig. 6E, Table S9**). Taken together, these results provide proof of principle that  
317 ARN22089 can inhibit tumor growth and vasculogenesis *in vivo* by modulating similar pathways  
318 that were observed *in vitro*.

319

## 320 **DISCUSSION**

321 Targeting CDC42 family GTPases has been difficult secondary to its globular structure and limited  
322 small molecule binding pockets,<sup>1</sup> its extensive post-translationally modification in cells,<sup>43</sup> and the  
323 fact that these proteins are localized to discrete nanodomains<sup>44</sup>. We took a multipronged approach  
324 to identify molecules that would inhibit the protein-protein interaction between CDC42 and its  
325 downstream effectors. We identify a structurally conserved, allosteric drug binding pocket that is  
326 folded in GTP bound CDC42 and RHOJ, is stable through 500 ns-long molecular dynamic  
327 simulations, and is only partially formed and solvent exposed in GDP bound CDC42 (**Fig. 1**). This  
328 pocket directly interacts with Trp40 of PAK, indicating that molecules targeting this pocket would  
329 inhibit RHOJ/CDC42 and PAK interactions.

330

331 Starting from the discovery of the initial hit compound ARN12405, we built a structure-activity  
332 relationship (SAR) study that allowed us to develop the most promising new molecular entity,  
333 ARN22089, which we further characterized *in vitro*. First, we verified that: 1) the lead  
334 (ARN22089) could bind to CDC42; 2) it bound preferentially to active CDC42; 3) it bound more

335 avidly than other known CDC42 inhibitors (**Fig. 2D**). Second, we examined whether ARN22089  
336 has selective activity against CDC42 GTPases. ARN22089 could inhibit the interaction between  
337 RHOJ/CDC42 and PAK but did not block the interactions between the closely related RAC1  
338 GTPase and PAK or RAS/RAL and Raf at doses as high as 50  $\mu$ M (**Fig. 3B**). As a further  
339 validation, we established a bifluorescence complementation assay, which has been used to  
340 measure RHOJ protein-protein interactions,<sup>34</sup> to measure whether our compound could inhibit the  
341 protein-protein interaction between RHOJ/CDC42 and PAK1. ARN22089 could inhibit the  
342 interaction between RHOJ/CDC42 and PAK1 with an EC50 in the nanomolar range for CDC42  
343 and the uni-digit micromolar range for RHOJ (**Fig. 3C,D**).

344  
345 Many groups have sought to develop small molecules that inhibit protein-protein interactions,<sup>45</sup>  
346 including between Ras family members and their downstream effectors.<sup>46,47</sup> While several of these  
347 agents have made it to the clinic, others failed secondary to their suboptimal selectivity and off  
348 target-effects.<sup>4</sup> ARN22089 had single digit micromolar EC50s in a panel of cell lines (**Fig. 3A**)  
349 consistent with the EC50 values observed with other RAC/CDC42 family inhibitors<sup>48</sup> and non-  
350 covalent RAS family protein-protein interaction inhibitors.<sup>46,47</sup> Using a reverse phase protein array,  
351 we observed that ARN22089 selectively modulated signaling pathways known to be downstream  
352 of CDC42 with little off target effects on other kinase cascades- treatment of cells with 10 or 20  
353  $\mu$ M ARN22089 significantly modulated the expression of only 38 targets and the phosphorylation  
354 of only 10 targets (**Table S7**). CDC42 can directly bind and activate p70S6K,<sup>35</sup> inducing the  
355 phosphorylation of S6K at 234/235. This specific phosphorylation event was inhibited by  
356 ARN22089 (**Fig. 4A**). Moreover, we saw a more potent effect on this phosphorylation event when  
357 melanoma cell lines were incubated with this compound for longer times (**Fig. 4B**). PAK kinases



358 can modulate ERK signaling by phosphorylating MEK at Ser298<sup>49</sup> and also by phosphorylating  
359 Raf-1.<sup>50</sup> We observed that ARN22089 could inhibit ERK phosphorylation (**Fig. 4A,B**) and block  
360 the phosphorylation of MEK at Ser298 (data not shown). Taken together, these data indicate that  
361 while ARN22089 has a similar affinity for the protein-protein interaction interface as other drugs,  
362 it is highly selective as we observed: 1) no off-target activity as agonist or antagonist against a  
363 panel of 47 classical pharmacological targets (**Fig. S5A-E**); 2) a high degree of on-target  
364 modulation of CDC42 signaling (**Fig. 4**).

365  
366 Several other lines of evidence support the development of ARN22089 as a treatment for cancer.  
367 ARN22089 shows excellent solubility and has good chemical and metabolic stability, has a  
368 favorable absorption-distribution-metabolism-excretion (ADME) profile *in vitro*, and has  
369 favorable pharmacokinetics *in vivo* (intraperitoneal, intravenous, and oral administration).  
370 CDC42 family members regulate not only tumor cell proliferation but also tumor  
371 angiogenesis.<sup>5,6,14,40</sup> ARN22089 inhibited not only tumor cell growth but also inhibited vessel  
372 elongation in three dimensional vascularized tumor models, in contrast to PAK inhibitors, which  
373 affect tumor proliferation but not vessel growth (**Fig. 5A-C**). Anti-angiogenic effects were specific  
374 for tumor-associated vessels, as ARN22089 had no impact on vessel growth when tumors were  
375 not present (**Fig. 5D**). Finally, ARN22089 modulated the expression of genes involved in  
376 inflammation and apoptosis (**Fig. 4D,6E**), consistent with a role for the drug in inducing  
377 inflammation and apoptosis in tumors.<sup>51</sup>

378  
379 Before detailed formulation development, toxicokinetic, and pharmacokinetic characterization of  
380 the compound, we wanted to get a sense of the *in vivo* anti-cancer activity of the compound using

381 a crude formulation. We demonstrated that short term treatment of mice with ARN22089 could  
382 prolong survival in a BRAF mutant autochthonous mouse model of melanoma (**Fig. 6B**). In  
383 addition, short term treatment could slow the growth of 4/5 BRAF mutant human PDXs to some  
384 extent (**Fig. 6C**), including one PDX model that was generated from a BRAF inhibitor resistant  
385 tumor (**Fig. S6B**). Drug treatment induced necrosis in treated tumors, a phenomenon that is often  
386 observed with angiogenesis inhibitors<sup>52</sup>, consistent with the data obtained in the VMT models  
387 (**Fig. S6C,D**). Notably, prolonged treatment of tumors with increasing doses of ARN22089  
388 induced more profound tumor growth inhibition, an effect that was dose responsive (**Fig. 6D**).  
389 Although further optimization of dosing is still needed, gene expression analysis of tumors  
390 revealed that ARN22089 modulates many of the same pathways *in vivo* that were observed *in*  
391 *vitro*. Given the unique spectrum of pathways modulated by ARN22089 and the effects of the  
392 drug on the tumor and its microenvironment, this therapy has logical applications both as a primary  
393 treatment, as a combination treatment to reduce the dose limiting toxicities of existing agents, or  
394 as a treatment for tumors that have developed resistance to other agents. In a broader context,  
395 these studies provide a roadmap for the rational structure-based design of drugs targeting other  
396 RHO superfamily GTPases for other applications.

397

## 398 **MATERIALS AND METHODS**

### 399 **Computations**

#### 400 **Homology Modeling.**

401 As a template structure, we employed the CDC42 protein in complex with the CRIB domain of  
402 Pak6 (PDB code 2ODB, resolution of 2.4 Å). By means of Prime (Jacobson et al 2004) software  
403 implemented in Maestro, we modeled the FASTA sequence of RHOJ on the 2ODB X-ray structure

404 (i.e., Cdc42 template), and then the resulting structure was refined by using the Protein Preparation  
405 Wizard (Sastry et al 2013) workflow implemented in Maestro. According to this procedure,  
406 hydrogen atoms were added, and charges and protonation states were assigned titrating the protein  
407 at physiologic pH. The steric clashes were relieved by performing a small number of minimization  
408 steps, until the RMSD of the non-hydrogen atoms reached 0.30 Å.

409

#### 410 **Virtual screening.**

411 In the CDC42-PAK6 complex, we identified a pocket on the CDC42 surface in proximity of Ser71,  
412 Arg68 and Tyr64. Since this surface cavity is conserved in RHOJ, displaying the same residues as  
413 in CDC42 (i.e. Ser89, Arg86 and Tyr82), and also the tryptophan is conserved in PAK1, we used  
414 this pocket to center the grid. The cubic grid box was centered on Ser89 of RHOJ, having a  
415 dimension of  $26 \times 26 \times 26$  Å<sup>3</sup>. We screened a set of nonredundant ~20,000 molecules. These  
416 molecules belong to a proprietary chemical collection available in the D3 Department at IIT. The  
417 molecules 'database was prepared using LigPrep software implemented in Maestro. Firstly, we  
418 added hydrogens and generated ionization states at pH  $7.4 \pm 0.5$ . Then, we generated tautomers  
419 and all stereochemical isomers. For each structure containing a ring moiety, the low-energy  
420 conformation was computed and retained. Lastly, a short minimization step was carried out to  
421 relax the 3D structure of each molecule. At this point, we filtered the resulting database to discard  
422 molecules that are not endowed with drug-like properties. To do so, we firstly computed the  
423 ADME descriptors for each molecule using QikProp software implemented in Maestro. As filter,  
424 we discarded all the molecules that do not respect the Lipinsky's rule of five.<sup>53</sup> We used Glide to  
425 perform the virtual screening, using Single Precision and retaining one pose for each ligand.

426

## 427 **Molecular Dynamics Simulations.**

428 Molecular dynamics (MD) simulations were performed considering both our RhoJ structural  
429 model and Cdc42 X-Ray structure (PDBid 2ODB) in their ligand-free state, as well as four  
430 different protein-ligand complexes as obtained from our docking calculations. Specifically, two  
431 systems were built using our RhoJ structural model bound to either ARN22089 or ARN12405.  
432 Other two systems included Cdc42 (PDBid 2ODB) in complex with either ARN22089 or  
433 ARN12405. Additionally, the GTP substrate as well as the catalytic  $Mg^{2+}$  ion are present at the  
434 active site of the proteins, in all the systems. These models were hydrated with a 14Å layer of  
435 TIP3P water molecules<sup>54</sup> from the protein center. The coordinates of the water molecules at the  
436 catalytic center were taken from PDBid 2ODB. Sodium ions were added to neutralize the charge  
437 of the systems. The final models are enclosed in a box of  $\sim 89 \cdot 89 \cdot 89 \text{ \AA}^3$ , containing  $\sim 18,500$  water  
438 molecules, resulting in  $\sim 59,000$  atoms for each system.

439  
440 The AMBER-ff14SB force field<sup>55</sup> was used for the parametrization of the protein. The parameters  
441 for the ligands ARN12405 and ARN22089 were determined via Hartree-Fock calculation, with 6-  
442 31G\* basis set, convergence criterium SCF=Tight after structure optimization (DFT B3LYP  
443 functional; 6-31G\* basis set). Merz-Singh-Kollman scheme<sup>56</sup> was used for the atomic charge  
444 assignment. The GTP and the  $Mg^{2+}$  were parametrized according to Meagher KL et al.<sup>57</sup> and Allner  
445 et al.<sup>58</sup> respectively. Joung-Chetham parameters<sup>59</sup> were used for monovalent ions.

446  
447 All MD simulations were performed with Amber 20<sup>60</sup> and all the systems were object of the  
448 following equilibration protocol. To relax the water molecule and the ions, we performed an  
449 energy minimization imposing a harmonic potential of 300 kcal/mol  $\text{\AA}^2$  on the backbone, the GTP

450 and the docked compound, when present. Then, two consecutive MD simulations in NVT and NPT  
451 ensembles (1 ns and 10 ns, respectively) were carried out, imposing the previous positional  
452 restraints. To relax the solute, two additional energy minimizations steps were performed imposing  
453 positional restraints of 20 kcal/mol Å<sup>2</sup> and without any restraints, respectively. Such minimized  
454 systems were heated up to 303 K with four consecutive MD simulations in NVT (~0.1 ns, 100 K)  
455 and NPT ensembles (~0.1 ns, 100 K; ~0.1 ns, 200 K; ~0.2 ns, 303 K), imposing the previous  
456 positional restraints of 20 kcal/mol Å<sup>2</sup>. We used the Andersen-like temperature-coupling scheme<sup>61</sup>  
457 while pressure control was achieved with Monte Carlo barostat at reference pressure of 1 atm.  
458 Long-range electrostatics were treated with particle mesh Ewald method. We performed an  
459 additional MD simulation (~1.5 ns) in the NPT ensemble at 303 K without any restraint to relax  
460 the system at such temperature. Finally, multiple replicas of 500 ns were performed in the NPT  
461 ensemble for each system with an integration time step of 2 fs.

462

### 463 **His-Cdc42 production and purification**

464 His-Cdc42 wild-type (aminoacids Ile4-Pro182) was expressed in *E. coli* BL21 (DE3) cells using  
465 the pET28a expression vector. Overexpression was induced by 0.1 mM IPTG at OD<sub>600</sub> 0.8 in Luria  
466 Bertani broth and incubated over night at 18 °C. Cells were harvested by centrifugation at 6000 xg  
467 for 30 min and the pellet was stored at – 80 °C. Cells were defrosted by incubation at room  
468 temperature in 50 mM Tris-Cl buffer pH 7.5, 400 mM NaCl, 5 mM MgCl<sub>2</sub>, 50 μM GDP, 40 mM  
469 imidazole, 10 μg/ml DNase (Sigma) and 30 μg/ml Lysozyme (Sigma). Cells were lysed by  
470 sonication and centrifuged at 43000 xg at 4 °C for 1 h. The supernatant was incubated for 3h at 4  
471 °C, rotating, with Ni-NTA resin prior in batch purification. His-Cdc42 was eluted with 300 mM  
472 imidazole.

### 473 **Preparation of GppNHP/GDP-bound GTPase**

474 For the loading of GDP, the purified protein was dialyzed over night at 4 °C in 50 mM Tris pH  
475 8.5, 200 mM ammonium sulfate, 50 μM GDP (Jena Bioscience). For the loading of GppNHp, His-  
476 Cdc42 was instead dialyzed with 20 μM GppNHp (Jena Bioscience) in the presence of 5 U of  
477 Quick-CIP alkaline phosphatase (New England Biolabs). After dialysis, 2 mM MgCl<sub>2</sub> was added  
478 to the solution to stabilize nucleotide binding. The two samples were buffer exchanged in 20 mM  
479 Hepes pH 7.5, 40 mM NaCl, 5 mM MgCl<sub>2</sub>, 1 mM DTT and loaded on a RESOURCE Q (Cytiva)  
480 column for anion exchange chromatography. The efficiency of nucleotide loading was evaluated  
481 by native state mass spectrometry.<sup>62</sup> The purified proteins were buffer exchanged in 10 mM  
482 ammonium acetate pH 6.8 and diluted to 3 μM in 10 mM ammonium bicarbonate pH 6.5 added  
483 with final 3% acetonitrile. The samples were then infused at 40 μL/min in an electrospray ion  
484 source, coupled to a Synapt G2 QToF mass spectrometer operating in positive ion mode. Spectra  
485 were acquired over the 500-4000 m/z range.

### 486 **Target binding by microscale thermophoresis**

487 MicroScale Thermophoresis (MST) experiments were performed according to the NanoTemper  
488 technologies protocols in a Monolith NT.115 Pico (Pico Red / Nano Blue - NanoTemper  
489 Technologies). His-Cdc42 affinity for the RED-tris-NTA label was not optimal therefore Alexa  
490 Fluor 647–NHS dye was used. His-Cdc42 was labeled following the instructions of the MO-L001  
491 Monolith NT Protein Labeling Kit RED – NHS (NanoTemper Technologies). Labelled protein  
492 concentration in the binding reactions was 10 nM while compounds concentration was either 50  
493 or 100 μM. DMSO concentration was maintained constant across samples at either 0.5 % or 1 %.  
494 Solutions were prepared in 100 mM Trizma® base (Sigma) pH 7.5, 40 mM NaCl, 0.05% v/v  
495 Tween 20 and incubated 5 min before loading on Premium Capillaries and analysis. Binding was

496 detected at 24 °C, MST power high and 20% LED power. The MST traces were recorded as  
497 follows: 3 s MST power off, 20 s MST power on and 1 s MST power off. The difference in  
498 normalised fluorescence ( $\Delta F_{\text{norm}} [\%] = F_{\text{hot}}/F_{\text{cold}}$ ) between protein:compound sample and a protein  
499 only sample at 1.5-2-5 sec is calculated and plotted through MO.Affinity analysis v2.3  
500 (NanoTemper Technologies) and GraphPad Prism 8.0.0 (GraphPad Software, San Diego,  
501 California USA). Signal to noise ratio was used to evaluate the quality of the binding data  
502 according to NanoPedia instructions (NanoTemper Technologies). Only a signal-to-noise ratio of  
503 more than 5 was considered acceptable while a signal to noise of more than 12 was considered  
504 excellent.

#### 505 **CDC42 interaction assay**

506 A CDC42 activation assay was performed according the manufacturer's protocol (Cell Biolabs,  
507 San Diego, CA) as described previously <sup>2</sup>. Briefly, cells expressing high RHOJ (WM3248 or  
508 WM983B) were treated with ARN22089 at the indicated doses. 24 hours later the lysates from  
509 treated and untreated cells were unloaded of guanosine nucleotides and either loaded with GDP or  
510 GTP $\gamma$ S. Agarose beads conjugated with the PAK1 PBD or RAF RBD were used in pull down  
511 assays for RHOJ, CDC42, RAC1 or RAS and RAL, respectively. Precipitated lysates were then  
512 immunoblotted with indicated antibodies.

513

#### 514 **Immunoblotting**

515 Melanoma cells treated with ARN22089 for 6 or 24 h and lysed in RIPA buffer (EMD Millipore  
516 or an optimized cocktail (250 mM NaCL, 50 mM TrisCL pH 7.5, 0.125% Nadeoxycholate, 0.375%  
517 Triton-X100, 0.15% NP-40, 4 mM EDTA) containing protease and phosphatase inhibitors cocktail

518 (Thermo Scientific) and 1 mM PMSF and DTT. Lysates were then subjected to SDS-PAGE,  
519 transferred to PVDF membranes, followed by incubation with the indicated primary antibody and  
520 appropriate HRP-secondary antibody. ImageJ was used to perform densitometry.

521 A375 cells were maintained in DMEM (plus high glucose, L-glutamine, sodium pyruvate)  
522 supplemented with 10% FBS, 1% MEM NEAA and 1% antibiotic-antimycotic. WM3248 cells  
523 were maintained in 80% MCDB153 pH 7.30, 20% Leibovitz's L-15, 2% FBS, 5 ug/mL insulin  
524 (bovine), 1.68 mM CaCl<sub>2</sub>, and 1% antibiotic-antimycotic. All cells kept in 5% CO<sub>2</sub> incubator at  
525 37°C.

526

### 527 **Reverse Phase Protein Arrays (RPPA)**

528 Melanoma cells (WM3248) were seeded at  $3.6 \times 10^6$  cells per 150 mm plate and, 24 h later, treated  
529 with ARN22089 at 0, 5, 10, or 20  $\mu$ M. Six hours later, cells were scraped and centrifuged at 1.3  
530 KRPM for 15 min cold (between 4-16°C range). Pellets were snapped freeze in liquid nitrogen and  
531 shipped to MD Anderson Cancer Center core RPPA facility for RPPA analysis (**Table S5**). Three  
532 biological replicates for each sample were generated.

533 Multiple t test in Prism8 software was used to determine proteins with significant difference  
534 between 0 and 5, 10 or 20  $\mu$ M. Normalized linear values were used to perform the t test with the  
535 following parameters: (1) Individual P values were computed with fewer assumptions by analyzing  
536 each row individually and did not assume consistent standard deviation; (2) Multiple comparisons  
537 were not corrected for; (3) alpha 0.05 was selected.

538 Heatmaps of RPPA represent normalized values (normalized linear values of 5, 10 or 20  $\mu$ M  
539 divided by normalized linear values of 0  $\mu$ M) (**Table S5-7**). Nomenclatures on the RPPA  
540 heatmaps: name\_of\_antibody.species\_of\_antibody.status\_of\_antibody. V - antibody validated; C



541 - validation of antibody in progress; Q - antibody nonspecific; E - under evaluation; antibodies  
542 raised in M - mouse, G - goat, R - rabbit, or T - rat.

543

#### 544 **RNA-seq analysis**

545 WM3248 melanoma cells were seeded at  $8.4 \times 10^4$  cells. The next day, cells were treated with  
546 ARN22089 at 0, 4, or 6  $\mu\text{M}$  and harvested 24 h later by adding RLT lysis buffer (Qiagen).  
547 Similarly, a small chunk of PDX tumor was collected and lysed in RLT lysis buffer. RNA was  
548 extracted using a RNeasy kit (Qiagen) and sent to the Genomic Core Facility at UCI for library  
549 construction and sequencing.

550 For the cell lines, paired-end sequencing reads were aligned to the human reference genome  
551 (GRCh37/hg19) with Tophat v2.1 (used in conjunction with Bowtie2 v2.2.7 and Samtools v1.9)  
552 and processed with Tuxedo Suite (Cufflinks v2.2.1).<sup>63,64</sup> Heatmaps and other visualizations were  
553 generated using CummeRbund in R v4.0.3.

554 For PDX tumors, paired-end sequencing reads were aligned to both human and mouse reference  
555 genome (NCBI/GRCh38 and UCSC/mm10, respectively) using HISAT2 v2.1.0<sup>65</sup>; and Samtools  
556 v0.1.19 to convert to bam files and sort. Then Xenofilter<sup>66</sup> was used to remove mouse reads, and  
557 reads were counted using featureCounts (subread v1.5.0-p3). Differential expression analysis was  
558 done using DESeq2<sup>67</sup> in R.

559 Additional analyses of gene expressions were performed using STRING ('Search Tool for  
560 Retrieval of Interacting Genes/Proteins') and DAVID ('Database for Annotation, Visualization  
561 hand Integrated Discovery') to determine protein-protein network and functional annotation.<sup>68,69</sup>

562

#### 563 **Bi-fluorescence Complementation Assay**

564 Inducible HEK293 Flp-In T-REx cell line was a gift from Dr. Jean-Francois Cote in the Montreal  
565 Clinical Research Institute (IRCM), Montreal, Quebec, Canada.<sup>70</sup> Cells were maintained in  
566 DMEM supplemented with 10% fetal bovine serum (TET tested, heat inactivated, R&D  
567 SYSTEMS INC), 1% antibiotic-antimycotic, 10 µg/mL blasticidin and 100 µg/mL zeocin at 37°C  
568 in 5% CO<sub>2</sub>. Stable BiFC lines were generated by co-transfecting pOG44 and pKK-BiFC-Venus-  
569 CDC42/RHOJ-PAK1 plasmids (9:1 ratio) and selecting with 100 µg/mL hygromycin and 10  
570 µg/mL blasticidin 24-48 h after transfection. The CDC42 and RHOJ genes in the pKK-BiFC-  
571 Venus-CDC42/RHOJ-PAK1 plasmid, the following residues were modified to generate  
572 constitutively active form: CDC42, Q61L; RHOJ, Q79L.<sup>71,72</sup>

573 For CDC42 constitutively active (CA) assays, cells were seeded at 0.5 x 10<sup>5</sup> cells per well of a 4-  
574 chamber slide. The next day, cells were treated with indicated doses and induced with 2 µg/mL  
575 doxycycline (DOX), simultaneously. Twenty-four hours later, cells were washed in PBS and fixed  
576 with 4% para-formaldehyde and 0.10% Triton-X100 in PBS for 15-20 min. Cells were then  
577 washed with PBS and incubated with blocking buffer (10% goat serum in PBS) for 30 min at RT  
578 and incubated with primary antibody (anti-GFP Invitrogen chicken Y fraction) at 1:1000 in  
579 blocking buffer 4 h RT, slow nutating. Cells were washed once with PBS buffer for 5 min.  
580 Secondary antibody (Alexa 488 nm) at 1:1000 in blocking buffer and cells were incubated for 1 h  
581 at RT, followed by DAPI 1:1000 in PBS for 20 min at RT. Cells were washed 3 times with PBS  
582 buffer, each time 5 min at RT. Slides were mounted with mounting medium (Vectorshield).

583 For RHOJ CA assays, cells were seeded at 1.5 x 10<sup>5</sup> cells per well of a 4-chamber slide. Next day,  
584 cells were treated with indicated doses and induced with 2 µg/mL doxycycline (DOX),  
585 simultaneously. Eight hours later, cells were washed in PBS and fixed with 4% para-formaldehyde  
586 and 0.10% Triton-X100 in PBS for 15-20 min. Subsequent steps both clones were processed the

587 same. Cells were then washed with PBS and incubated with blocking buffer (10% goat serum in 1  
588 x PBS) for 30 min at RT and incubated with primary antibody (anti-GFP Invitrogen chicken Y  
589 fraction) at 1:2000 in blocking buffer overnight at 4°C, slow nutating. Cells were washed once  
590 with PBS buffer for 5 min. Secondary antibody (Alexa 488 nm) at 1:1000 in blocking buffer and  
591 cells were incubated for 1 h at RT, followed by DAPI 1:1000 in PBS for 20 min at RT. Cells were  
592 washed 3 times with PBS buffer, each time 5 min at RT. Slides were mounted with mounting  
593 medium (Vectorshield).

594 Slides were viewed using the Keyence BZ-X810 Wide-Field Microscope in the Stem Cell  
595 Research Center at the University of California, Irvine (UCI). Images were captured at high  
596 resolution with the same exposure time. Fluorescent images were quantified using Imaris software  
597 (BitPlane). Measurement setting includes surface masking [parameters: segment only a region of  
598 interest (excluding bright and blurry spots), classify surfaces, object-object statistics] to measure  
599 absolute intensity (threshold intensity adjusted for each image), and filter was set to “Number of  
600 Voxels  $Img=1$ ”  $> 10$ . Intensity mean of all areas average from 5-6 images per condition at 20 x  
601 magnification. Percent average intensity mean was calculated as follow:  $((Dose_1 -$   
602  $NoDOX)/(DOX - NoDOX)) \times 100$ . The standard error of mean was calculated taking the percent  
603 mean of intensity mean and divided by the square root of the number of surface areas measured.

604

### 605 **Vascularized Microtumor Assay**

606 Methods for microfluidic device fabrication and establishing VMTs have been described  
607 previously (Sobrinho 2016). Briefly, human endothelial colony-forming cell-derived endothelial  
608 cells (ECFC-EC) are isolated from cord blood via selection for the CD31<sup>+</sup> cell population and  
609 cultured in EGM2 medium (Lonza). Normal human lung fibroblasts (LF) are purchased from

610 Lonza. Cancer cells and LF are cultured in DMEM (Corning) containing 10% FBS (Gemini Bio).  
611 The ECFC-EC and cancer cells were transduced with lentivirus expressing mCherry (LeGO-C2,  
612 plasmid # 27339) or green fluorescent protein (GFP) (LeGO-V2, plasmid # 27340) (Addgene,  
613 Cambridge, Massachusetts). To load the microfluidic device, ECFC-EC and LF (both  $8 \times 10^6$   
614 cells/mL) and cancer cells ( $2.5 \times 10^6$  cells/mL) were resuspended in fibrinogen solution (10 mg/mL  
615 basal medium). The cell slurry was then mixed with 1  $\mu$ L thrombin (3 U/mL) to catalyze gel  
616 solidification and quickly loaded into the tissue chambers of each VMT unit. Fibrin ECM was  
617 allowed to solidify at 37°C for 15 minutes prior to introducing ECM and EGM2 medium through  
618 the microfluidic channels. All cells and VMTs are cultured in a 37 °C, 20% O<sub>2</sub>, 5% O<sub>2</sub>  
619 environment.

620

### 621 **Vascularized Microtumor Treatment**

622 After culturing for 5 days to allow full development of each VMT, culture medium is replaced by  
623 medium containing the drugs (ARN22089, FRAX or vehicle) at the desired concentration and  
624 delivered through the microfluidic channels using the hydrostatic pressure gradient. Fluorescence  
625 images were acquired with an Olympus IX70 inverted microscope using SPOT software (SPOT  
626 Imaging, Sterling Heights, Michigan). AngioTool software (National Cancer Institute) was used  
627 to quantify vessel length in the VMT and ImageJ software (National Institutes of Health) was  
628 utilized to measure the total fluorescence intensity (i.e. mean grey value) for each tumor image to  
629 quantify tumor growth. Each chamber was normalized to time 0 baseline.

630

### 631 **Cancer cell line viability assay**

632 Cancer cell line viability assay was performed by Proqinase with ARN22089 that we provided.  
633 Cells were cultured in their appropriate media and seeded in white multi-well plates. For the  
634 assays, cells were incubated with compound at 37°C overnight before compound was added. Cells  
635 were incubated in compound for 72 hours, and a CellTiterGlo assay was performed to quantify  
636 viable cells. The IC<sub>50</sub> was calculated in a panel of 100 cell lines.

637

### 638 **PK Determination**

639 ARN22089 was administered at 10 mg/kg PO and IP, while it was injected at 3 mg/kg IV to male  
640 mice. The vehicle for all administration routes was PEG400/Tween 80/Saline solution at  
641 10/10/80% in volume, respectively. Three animals per dose/time point were treated, and blood  
642 samples were collected at selected time points up to 480 min. Plasma was separated from blood  
643 by centrifugation for 15 min at 1500 rpm at 4°C, collected in eppendorf tubes and frozen (-80°C).  
644 Control animals treated with vehicle only were also included in the experimental protocol. Plasma  
645 samples were centrifuged at 21,100 g for 15 min at 4°C. A 50 µl aliquot was transferred into a 96-  
646 Deep Well plate and 150 µl of extraction solution was added. The extraction solution was  
647 consisting of cold CH<sub>3</sub>CN spiked with 200 nM of internal standard. The plate was centrifuged at  
648 21,100 g for 15 min at 4°C. Eight microliters of supernatant were then transferred into a 96-Deep  
649 Well plate and 80 µl of H<sub>2</sub>O was added. A reference standard of the compound was spiked in naïve  
650 mouse plasma to prepare a calibration curve over a 1 nM – 10 µM range. Three quality control  
651 samples were prepared by spiking the compound in blank mouse plasma to the final concentrations  
652 of 20, 200 and 2000 nM. Calibrators and quality controls were extracted with the same extraction  
653 solution used for the plasma samples. The samples were analyzed on a Waters ACQUITY  
654 UPLC/MS TQD system (Waters Inc. Milford, USA) consisting of a TQD (Triple Quadrupole

655 Detector) Mass Spectrometer equipped with an Electrospray Ionization interface and a Photodiode  
656 Array e $\lambda$  Detector. The analyses were run on an ACQUITY UPLC BEH C18 (50 x 2.1 mmID,  
657 particle size 1.7  $\mu$ m) with a VanGuard BEH C18 pre-column (5 x 2.1 mmID, particle size 1.7  $\mu$ m)  
658 at 40°C. 0.1% HCOOH in H<sub>2</sub>O (A) and 0.1% HCOOH in CH<sub>3</sub>CN (B) were used as mobile phase  
659 with a linear gradient from 50 to 100% B in 2 min with the flow rate set to 0.5 mL/min.  
660 Electrospray ionization was applied in positive mode. Plasma levels of the parent compound was  
661 quantified by monitoring the MRM peak areas.

662

### 663 **Aqueous kinetic solubility assay**

664 The aqueous kinetic solubility was determined from a 10mM DMSO stock solution of test  
665 compound in Phosphate Buffered Saline (PBS) at pH 7.4. The study was performed by incubation  
666 of an aliquot of 10mM DMSO stock solution in PBS (pH 7.4) at a target concentration of 250  $\mu$ M  
667 resulting in a final concentration of 2.5% DMSO. The incubation was carried out under shaking at  
668 25°C for 24 h followed by centrifugation at 14,800 rpm for 30 min. The supernatant was analyzed  
669 by UPLC/MS for the quantification of dissolved compound (in  $\mu$ M) by UV at a specific  
670 wavelength (215 nm). The UPLC/MS analyses were performed on a Waters ACQUITY UPLC/MS  
671 system consisting of a Single Quadrupole Detector (SQD) Mass Spectrometer (MS) equipped with  
672 an Electrospray Ionization (ESI) interface and a Photodiode Array Detector (PDA). The PDA  
673 range was 210-400 nm. ESI in positive mode was used in the mass scan range 100-650 Da. The  
674 analyses were run on an ACQUITY UPLC BEH C18 column (50 x 2.1 mmID, particle size 1.7  
675  $\mu$ m) with a VanGuard BEH C18 pre-column (5 x 2.1 mmID, particle size 1.7  $\mu$ m), using 10 mM  
676 NH<sub>4</sub>OAc in H<sub>2</sub>O at pH 5 adjusted with AcOH (A) and 10mM NH<sub>4</sub>OAc in CH<sub>3</sub>CN-H<sub>2</sub>O (95:5) at  
677 pH 5 (B) as mobile phase.

678 The thermodynamic solubility was determined by addition of Phosphate Buffered Saline (PBS) at  
679 pH 7.4 to an excess of solid test compound. The study was performed by incubation of an aliquot  
680 of 2.5mg of test compound in 500 $\mu$ L of PBS at pH 7.4 (final target concentration: 5mg/mL). The  
681 suspension was shaken at 300rpm for 24h at 25°C. The pH of the suspension was measured at the  
682 beginning and at the end of the incubation. At the end of the incubation, the saturated solution was  
683 filtered and analyzed by LC-MS for the quantification of dissolved compound by UV at 254nm  
684 using a calibration curve. The analyses were performed on a Waters ACQUITY UPLC-MS system  
685 consisting of a Single Quadrupole Detector (SQD) Mass Spectrometer equipped with an  
686 Electrospray Ionization interface and a Photodiode Array Detector from Waters Inc. (Milford, MA,  
687 USA). Electrospray ionization in positive mode was used in the mass scan range 100-650Da. The  
688 PDA range was 210-400nm. The analyses were run on an ACQUITY UPLC BEH C18 column  
689 (100x2.1mmID, particle size 1.7 $\mu$ m) with a VanGuard BEH C18 pre-column (5x2.1mmID,  
690 particle size 1.7 $\mu$ m), using 10mM NH<sub>4</sub>OAc in H<sub>2</sub>O at pH 5 adjusted with CH<sub>3</sub>COOH (A) and  
691 10mM NH<sub>4</sub>OAc in CH<sub>3</sub>CN-H<sub>2</sub>O (95:5) at pH 5 (B) as mobile phase.

692

### 693 ***In vitro* mouse plasma stability assay**

694 10mM DMSO stock solution of test compound was diluted 50-fold with DMSO-H<sub>2</sub>O (1:1) and  
695 incubated at 37°C for 2 h with mouse plasma added 5% DMSO (pre-heated at 37°C for 10 min).  
696 The final concentration was 2  $\mu$ M. At each time point (0, 5, 15, 30, 60, 120 min), 50  $\mu$ L of  
697 incubation mixture was diluted with 200  $\mu$ L cold CH<sub>3</sub>CN spiked with 200 nM of internal standard,  
698 followed by centrifugation at 3.750 rpm for 20 min. The supernatant was further diluted with H<sub>2</sub>O  
699 (1:1) for analysis. The concentration of test compound was quantified by LC/MS-MS on a Waters  
700 ACQUITY UPLC/MS TQD system consisting of a Triple Quadrupole Detector (TQD) Mass

701 Spectrometer (MS) equipped with an Electrospray Ionization (ESI) interface. The analyses were  
702 run on an ACQUITY UPLC BEH C18 column (50 x 2.1 mmID, particle size 1.7  $\mu$ m) with a  
703 VanGuard BEH C18 pre-column (5 x 2.1 mmID, particle size 1.7 $\mu$ m) at 40°C, using H<sub>2</sub>O + 0.1%  
704 HCOOH in H<sub>2</sub>O (A) and CH<sub>3</sub>CN + 0.1% HCOOH (B) as mobile phase. ESI was applied in  
705 positive mode. The response factors, calculated on the basis of the internal standard peak area,  
706 were plotted over time. Response factor versus time profiles were fitted with Prism (GraphPad  
707 Software, Inc., USA) to estimate compounds half-life ( $t_{1/2}$ ) in mouse plasma.

708

#### 709 **In vitro microsomal stability assay.**

710 10mM DMSO stock solution of each compound was pre-incubated at 37°C for 15 min with mouse  
711 liver microsomes in 0.1M Tris-HCl buffer (pH 7.4). The final concentration was 4.6 $\mu$ M. After pre-  
712 incubation, the co-factors (NADPH, G6P, G6PDH and MgCl<sub>2</sub> pre-dissolved in 0.1M Tris-HCl)  
713 were added to the mixture and the incubation was continued at 37°C for 1h. At each time point (0,  
714 5, 15, 30, 60min), 30 $\mu$ L of mixture was diluted with 200 $\mu$ L cold CH<sub>3</sub>CN spiked with 200nM of  
715 internal standard, followed by centrifugation at 3500g for 15min. The supernatant was then further  
716 diluted with H<sub>2</sub>O (1:1) for analysis. The concentration of each compound was quantified by  
717 LC/MS-MS on a Waters ACQUITY UPLC/MS TQD system consisting of a TQD (Triple  
718 Quadrupole Detector) Mass Spectrometer equipped with an Electrospray Ionization interface. The  
719 analyses were run on an ACQUITY UPLC BEH C18 (50x2.1mm ID, particle size 1.7 $\mu$ m) with a  
720 VanGuard BEH C18 pre-column (5x2.1mm ID, particle size 1.7 $\mu$ m) at 40°C, using 0.1% HCOOH  
721 in H<sub>2</sub>O (A) and 0.1% HCOOH in CH<sub>3</sub>CN (B) as mobile phases. The percentage of test compound  
722 remaining at each time point relative to the amount observed at t=0 was calculated. The half-lives



723 ( $t_{1/2}$ ) were determined by a one-phase decay equation using a non-linear regression of compound  
724 concentration versus time.

725

### 726 **Mouse strains and PDX tumors**

727 All animal experiments were approved by the UC Irvine Institutional Animal Care and Use  
728 Committee (IACUC) (AUP-17-230). NOD.Cg-*Prkdc<sup>scid</sup> IL2rg<sup>tm1Wjl</sup>/SzJ* (NSG) mice were  
729 purchased from The Jackson Laboratories (stock number 005557). Human melanoma PDX tumors  
730 (563396-261-R, 128128-338-R, 174941-126-T, 156681-154-R, 425362-254-T) were purchased  
731 from Patient Derived Materials Repository (National Cancer Institute). Initial frozen tumors were  
732 divided into evenly sized pieces and kept viable in ice cold RPMI (Corning) with 10% FBS. Small  
733 incisions were made on both flanks of anesthetized NSG mice, with a single tumor piece placed  
734 under the skin near each incision. Tumors were allowed to form and reach 10% body mass before  
735 passaging into subsequent mice for drug studies. Excess portions of the tumor were frozen in RPMI  
736 with 10% FBS and 10% DMSO. Following tumor placement, mice were monitored until the  
737 tumors reached 100-200 mm<sup>3</sup> to start drug treatment.

738

### 739 **Drug treatment for PDX tumors**

740 ARN22089 was dissolved for 10 mg/kg doses in 100  $\mu$ L of vehicle (80% Saline, 10% Tween80,  
741 and 10% PEG400). Stocks of concentrated drug were frozen at -20°C for long term and kept at  
742 4°C for up to 5 days. Mice were treated with 100  $\mu$ L of vehicle or RhoJ inhibitor twice daily for  
743 two weeks (morning and evening) through interperitoneal (IP) injections. Starting the same day as  
744 injections, tumor volumes were measured by caliper twice a week. Estimated tumor volumes were  
745 calculated by multiplying length by the width squared. At least four mice were imaged for each

746 PDX during the course of treatment and continued until the tumors reached endpoint (1500 mm<sup>3</sup>).  
747 At endpoint, tumors were collected for histological analysis. For I.P. *BRAF*<sup>V600E</sup>, *PTPN11*<sup>N58S</sup>  
748 tumors; *BRAF*<sup>V600E</sup> – Vemurafenib Resistant tumors; *BRAF*<sup>V600E</sup>, *PTEN*<sup>H259Y</sup>, *TP53*<sup>C227Y</sup> tumors  
749 both male and female mice used in vehicle and ARN22089 treatment groups. All of the *BRAF*<sup>V600K</sup>  
750 tumors were grown in female mice, while all of the *BRAF*<sup>V600E</sup>, *PTEN*<sup>H259Y</sup>, *TP53*<sup>C227Y</sup> tumors were  
751 grown in male mice. Statistical analysis was completed on the tumor growth measurements using  
752 a two-way ANOVA comparing treatment groups for each PDX over time with TukeyHSD  
753 pairwise comparisons between timepoints in R (version 3.5.3).  
754 Intravenous (IV) tail vein injections of ARN22089 were prepared at 10 mg/kg, 25 mg/kg, and 50  
755 mg/kg as described above. Female mice were treated by IV twice a week as the *BRAF*<sup>V600E</sup>,  
756 *PTPN11*<sup>N58S</sup> tumors grew, for four weeks. Tumor and tissues were collected for histological  
757 analysis. Statistical analysis on tumor growth were completed in R (version 3.5.3) with a two-way  
758 ANOVA comparing treatment groups for each PDX over time with TukeyHSD pairwise  
759 comparisons between timepoints.

760

## 761 **Tissue Collection**

762 Once tumors reached endpoint, various tissues were collected including the tumors, liver, and  
763 lymph nodes. All organs were fixed overnight in 10% formalin prior to washing and an ethanol  
764 dehydration series. Fixed tissue was sent to the Experimental Tissue Resource (UCI Department  
765 of Pathology) for embedding and preliminary staining by H&E and S100. The percentage of tumor  
766 necrosis was determined from H&E sections by a pathologist blinded to treatment groups.  
767 Statistical test on necrosis scores was completed using a student's t-test in R (version 3.5.3).

768

769 **ACKNOWLEDGEMENTS**

770 We thank Jessica Shiu, Zachary Springs, Pezhman Mobasher, Terry Nguyen, Celine Saade,  
771 Madeline McCanne, Katrina Huynh and and Giuliana Ottonello for their assistance with drug  
772 treatments and DMPK evaluation. We thank the co-founders of Alyra Therapeutics, Mark  
773 Benedyk and Alessandro Monge, for their advice and suggestions during the drug development  
774 and validation studies. This work was supported by grants from the National Cancer Institute  
775 (R01CA244571, U54CA217378) and the University of California, Irvine Chao Family  
776 Comprehensive Cancer Center Anti-Cancer Challenge to AKG and The Italian Foundation for  
777 Cancer Research (AIRC) (IG 18883 and IG 23679). JLF was supported by an NCI training grant  
778 to the Cancer Research Institute at the University of California, Irvine (T32CA009054-37).

779 The RPPA Core is supported by NCI Grant # CA16672 and Dr. Yiling Lu's NIH R50 Grant #  
780 R50CA221675: Functional Proteomics by Reverse Phase Protein Array in Cancer. This work was  
781 made possible, in part, through access to the Genomics High Throughput Facility Shared Resource  
782 of the Cancer Center Support Grant (P30CA-062203) at the University of California, Irvine and  
783 NIH shared instrumentation grants 1S10RR025496-01, 1S10OD010794-01, and 1S10OD021718-  
784 01. The content is solely the responsibility of the authors and does not necessarily represent the  
785 official views of the National Institutes of Health.

786

787

788 **CONFLICT OF INTEREST**

789 Anand Ganesan and Marco De Vivo are co-founders of a company entitled Alyra Therapeutics  
790 based on the technology presented in this manuscript.

791

792

793

794

795

796

797

798

799

800

801

802

803

804

805

806

807

808

809

810

811

812

813

814 **REFERENCES**

- 815 1 Maldonado, M. D. M. & Dharmawardhane, S. Targeting Rac and Cdc42 GTPases in  
816 Cancer. *Cancer Res* **78**, 3101-3111, doi:10.1158/0008-5472.CAN-18-0619 (2018).
- 817 2 Ruiz, R. *et al.* The RhoJ-BAD signaling network: An Achilles' heel for BRAF mutant  
818 melanomas. *PLoS Genet* **13**, e1006913, doi:10.1371/journal.pgen.1006913 (2017).
- 819 3 Wang, H. *et al.* Prominent Oncogenic Roles of EVI1 in Breast Carcinoma. *Cancer Res* **77**,  
820 2148-2160, doi:10.1158/0008-5472.CAN-16-0593 (2017).
- 821 4 Kim, C. *et al.* Rho GTPase RhoJ is Associated with Gastric Cancer Progression and  
822 Metastasis. *J Cancer* **7**, 1550-1556, doi:10.7150/jca.15578 (2016).
- 823 5 Wilson, E. *et al.* RhoJ interacts with the GIT-PIX complex and regulates focal adhesion  
824 disassembly. *J Cell Sci* **127**, 3039-3051, doi:10.1242/jcs.140434 (2014).
- 825 6 Kim, C. *et al.* Vascular RhoJ is an effective and selective target for tumor angiogenesis and  
826 vascular disruption. *Cancer Cell* **25**, 102-117, doi:10.1016/j.ccr.2013.12.010 (2014).
- 827 7 Takase, H. *et al.* Genome-wide identification of endothelial cell-enriched genes in the  
828 mouse embryo. *Blood* **120**, 914-923, doi:10.1182/blood-2011-12-398156 (2012).
- 829 8 Boscher, C., Gaonac'h-Lovejoy, V., Delisle, C. & Gratton, J. P. Polarization and sprouting  
830 of endothelial cells by angiopoietin-1 require PAK2 and paxillin-dependent Cdc42  
831 activation. *Mol Biol Cell* **30**, 2227-2239, doi:10.1091/mbc.E18-08-0486 (2019).
- 832 9 El Atat, O., Fakih, A. & El-Sibai, M. RHOQ Activates RAC1 through CDC42 Leading to  
833 Tube Formation in Vascular Endothelial Cells. *Cells* **8**, doi:10.3390/cells8020171 (2019).
- 834 10 Xiao, X. H. *et al.* Regulating Cdc42 and Its Signaling Pathways in Cancer: Small  
835 Molecules and MicroRNA as New Treatment Candidates. *Molecules* **23**,  
836 doi:10.3390/molecules23040787 (2018).
- 837 11 Lu, H. *et al.* PAK signalling drives acquired drug resistance to MAPK inhibitors in BRAF-  
838 mutant melanomas. *Nature* **550**, 133-136, doi:10.1038/nature24040 (2017).
- 839 12 Han, S. W. *et al.* RNA editing in RHOQ promotes invasion potential in colorectal cancer.  
840 *J Exp Med* **211**, 613-621, doi:10.1084/jem.20132209 (2014).
- 841 13 Bridges, E. *et al.* RHOQ is induced by DLL4 and regulates angiogenesis by determining  
842 the intracellular route of the Notch intracellular domain. *Angiogenesis* **23**, 493-513,  
843 doi:10.1007/s10456-020-09726-w (2020).
- 844 14 Haga, R. B. & Ridley, A. J. Rho GTPases: Regulation and roles in cancer cell biology.  
845 *Small GTPases* **7**, 207-221, doi:10.1080/21541248.2016.1232583 (2016).
- 846 15 Zins, K., Gunawardhana, S., Lucas, T., Abraham, D. & Aharinejad, S. Targeting Cdc42  
847 with the small molecule drug AZA197 suppresses primary colon cancer growth and  
848 prolongs survival in a preclinical mouse xenograft model by downregulation of PAK1  
849 activity. *J Transl Med* **11**, 295, doi:10.1186/1479-5876-11-295 (2013).
- 850 16 Pelish, H. E. *et al.* Secramine inhibits Cdc42-dependent functions in cells and Cdc42  
851 activation in vitro. *Nat Chem Biol* **2**, 39-46, doi:10.1038/nchembio751 (2006).
- 852 17 Hampsch, R. A. *et al.* Therapeutic sensitivity to Rac GTPase inhibition requires  
853 consequential suppression of mTORC1, AKT, and MEK signaling in breast cancer.  
854 *Oncotarget* **8**, 21806-21817, doi:10.18632/oncotarget.15586 (2017).
- 855 18 Pleines, I. *et al.* Defective tubulin organization and proplatelet formation in murine  
856 megakaryocytes lacking Rac1 and Cdc42. *Blood* **122**, 3178-3187, doi:10.1182/blood-  
857 2013-03-487942 (2013).

- 858 19 Dutting, S. *et al.* Critical off-target effects of the widely used Rac1 inhibitors NSC23766  
859 and EHT1864 in mouse platelets. *J Thromb Haemost* **13**, 827-838, doi:10.1111/jth.12861  
860 (2015).
- 861 20 Sawada, N., Li, Y. & Liao, J. K. Novel aspects of the roles of Rac1 GTPase in the  
862 cardiovascular system. *Curr Opin Pharmacol* **10**, 116-121,  
863 doi:10.1016/j.coph.2009.11.004 (2010).
- 864 21 O'Bryan, J. P. Pharmacological targeting of RAS: Recent success with direct inhibitors.  
865 *Pharmacol Res* **139**, 503-511, doi:10.1016/j.phrs.2018.10.021 (2019).
- 866 22 De Vivo, M. & Cavalli, A. Recent advances in dynamic docking for drug discovery. *WIREs*  
867 *Computational Molecular Science* **7**, e1320, doi:<https://doi.org/10.1002/wcms.1320>  
868 (2017).
- 869 23 De Vivo, M., Masetti, M., Bottegoni, G. & Cavalli, A. Role of Molecular Dynamics and  
870 Related Methods in Drug Discovery. *J Med Chem* **59**, 4035-4061,  
871 doi:10.1021/acs.jmedchem.5b01684 (2016).
- 872 24 Hoffman, G. R., Nassar, N. & Cerione, R. A. Structure of the Rho family GTP-binding  
873 protein Cdc42 in complex with the multifunctional regulator RhoGDI. *Cell* **100**, 345-356,  
874 doi:10.1016/s0092-8674(00)80670-4 (2000).
- 875 25 Ha, B. H. & Boggon, T. J. CDC42 binds PAK4 via an extended GTPase-effector interface.  
876 *Proc Natl Acad Sci U S A* **115**, 531-536, doi:10.1073/pnas.1717437115 (2018).
- 877 26 Morreale, A. *et al.* Structure of Cdc42 bound to the GTPase binding domain of PAK. *Nat*  
878 *Struct Biol* **7**, 384-388, doi:10.1038/75158 (2000).
- 879 27 LeCour, L., Jr. *et al.* The Structural Basis for Cdc42-Induced Dimerization of IQGAPs.  
880 *Structure* **24**, 1499-1508, doi:10.1016/j.str.2016.06.016 (2016).
- 881 28 La Sala, G., Decherchi, S., De Vivo, M. & Rocchia, W. Allosteric Communication  
882 Networks in Proteins Revealed through Pocket Crosstalk Analysis. *ACS Central Science*  
883 **3**, 949-960, doi:10.1021/acscentsci.7b00211 (2017).
- 884 29 Ho, H. *et al.* RhoJ regulates melanoma chemoresistance by suppressing pathways that  
885 sense DNA damage. *Cancer Res* **72**, 5516-5528, doi:10.1158/0008-5472.CAN-12-0775  
886 (2012).
- 887 30 Friesland, A. *et al.* Small molecule targeting Cdc42-intersectin interaction disrupts Golgi  
888 organization and suppresses cell motility. *Proc Natl Acad Sci U S A* **110**, 1261-1266,  
889 doi:10.1073/pnas.1116051110 (2013).
- 890 31 Umbayev, B. *et al.* Elevated levels of the small GTPase Cdc42 induces senescence in male  
891 rat mesenchymal stem cells. *Biogerontology* **19**, 287-301, doi:10.1007/s10522-018-9757-  
892 5 (2018).
- 893 32 Kim, J. M., Kim, M. Y., Lee, K. & Jeong, D. Distinctive and selective route of  
894 PI3K/PKCalpha-PKCdelta/RhoA-Rac1 signaling in osteoclastic cell migration. *Mol Cell*  
895 *Endocrinol* **437**, 261-267, doi:10.1016/j.mce.2016.08.042 (2016).
- 896 33 Rudolph, M. G. *et al.* Thermodynamics of Ras/effector and Cdc42/effector interactions  
897 probed by isothermal titration calorimetry. *J Biol Chem* **276**, 23914-23921,  
898 doi:10.1074/jbc.M011600200 (2001).
- 899 34 Lepur, A. & Vugrek, O. Bimolecular Fluorescence Complementation to Visualize Protein-  
900 Protein Interactions in Human Cells Based on Gateway Cloning Technology. *Methods Mol*  
901 *Biol* **1794**, 259-267, doi:10.1007/978-1-4939-7871-7\_17 (2018).

- 902 35 Chou, M. M. & Blenis, J. The 70 kDa S6 kinase complexes with and is activated by the  
903 Rho family G proteins Cdc42 and Rac1. *Cell* **85**, 573-583, doi:10.1016/s0092-  
904 8674(00)81257-x (1996).
- 905 36 Ferrari, S., Bandi, H. R., Hofsteenge, J., Bussian, B. M. & Thomas, G. Mitogen-activated  
906 70K S6 kinase. Identification of in vitro 40 S ribosomal S6 phosphorylation sites. *J Biol*  
907 *Chem* **266**, 22770-22775 (1991).
- 908 37 Basak, C. *et al.* NF-kappaB- and C/EBPbeta-driven interleukin-1beta gene expression and  
909 PAK1-mediated caspase-1 activation play essential roles in interleukin-1beta release from  
910 *Helicobacter pylori* lipopolysaccharide-stimulated macrophages. *J Biol Chem* **280**, 4279-  
911 4288, doi:10.1074/jbc.M412820200 (2005).
- 912 38 Hsu, Y. H., Moya, M. L., Hughes, C. C., George, S. C. & Lee, A. P. A microfluidic platform  
913 for generating large-scale nearly identical human microphysiological vascularized tissue  
914 arrays. *Lab Chip* **13**, 2990-2998, doi:10.1039/c3lc50424g (2013).
- 915 39 Moya, M. L., Hsu, Y. H., Lee, A. P., Hughes, C. C. & George, S. C. In vitro perfused  
916 human capillary networks. *Tissue Eng Part C Methods* **19**, 730-737,  
917 doi:10.1089/ten.TEC.2012.0430 (2013).
- 918 40 Wang, X. *et al.* Engineering anastomosis between living capillary networks and endothelial  
919 cell-lined microfluidic channels. *Lab Chip* **16**, 282-290, doi:10.1039/c5lc01050k (2016).
- 920 41 Sobrino, A. *et al.* 3D microtumors in vitro supported by perfused vascular networks. *Sci.*  
921 *Reports*. **6**, 31589, doi:DOI: 10.1038/srep31589 (2016).
- 922 42 Kalyanamoorthy, S. & Barakat, K. H. Development of Safe Drugs: The hERG Challenge.  
923 *Med Res Rev* **38**, 525-555, doi:10.1002/med.21445 (2018).
- 924 43 Olson, M. F. Rho GTPases, their post-translational modifications, disease-associated  
925 mutations and pharmacological inhibitors. *Small GTPases* **9**, 203-215,  
926 doi:10.1080/21541248.2016.1218407 (2018).
- 927 44 Croise, P., Estay-Ahumada, C., Gasman, S. & Ory, S. Rho GTPases, phosphoinositides,  
928 and actin: a tripartite framework for efficient vesicular trafficking. *Small GTPases* **5**,  
929 e29469, doi:10.4161/sgtp.29469 (2014).
- 930 45 Lu, H. *et al.* Recent advances in the development of protein-protein interactions  
931 modulators: mechanisms and clinical trials. *Signal Transduct Target Ther* **5**, 213,  
932 doi:10.1038/s41392-020-00315-3 (2020).
- 933 46 Bery, N. *et al.* BRET-based RAS biosensors that show a novel small molecule is an  
934 inhibitor of RAS-effector protein-protein interactions. *Elife* **7**, doi:10.7554/eLife.37122  
935 (2018).
- 936 47 Quevedo, C. E. *et al.* Small molecule inhibitors of RAS-effector protein interactions  
937 derived using an intracellular antibody fragment. *Nat Commun* **9**, 3169,  
938 doi:10.1038/s41467-018-05707-2 (2018).
- 939 48 Maldonado, M. D. M., Medina, J. I., Velazquez, L. & Dharmawardhane, S. Targeting Rac  
940 and Cdc42 GEFs in Metastatic Cancer. *Front Cell Dev Biol* **8**, 201,  
941 doi:10.3389/fcell.2020.00201 (2020).
- 942 49 Wang, Z. *et al.* p21-activated kinase 1 (PAK1) can promote ERK activation in a kinase-  
943 independent manner. *J Biol Chem* **288**, 20093-20099, doi:10.1074/jbc.M112.426023  
944 (2013).
- 945 50 Coles, L. C. & Shaw, P. E. PAK1 primes MEK1 for phosphorylation by Raf-1 kinase  
946 during cross-cascade activation of the ERK pathway. *Oncogene* **21**, 2236-2244,  
947 doi:10.1038/sj.onc.1205302 (2002).

- 948 51 Gan, J. *et al.* Growth hormone-releasing hormone receptor antagonists inhibit human  
949 gastric cancer through downregulation of PAK1-STAT3/NF-kappaB signaling. *Proc Natl*  
950 *Acad Sci U S A* **113**, 14745-14750, doi:10.1073/pnas.1618582114 (2016).
- 951 52 Yoshida, S. *et al.* Tumor Angiogenic Inhibition Triggered Necrosis (TAITN) in Oral  
952 Cancer. *Cells* **8**, doi:10.3390/cells8070761 (2019).
- 953 53 Lipinski, C. A. Lead- and drug-like compounds: the rule-of-five revolution. *Drug Discov*  
954 *Today Technol* **1**, 337-341, doi:10.1016/j.ddtec.2004.11.007 (2004).
- 955 54 Jorgensen, W. L., Chandrasekhar, J., Madura, J. D., Impey, R. W. & Klein, M. L.  
956 Comparison of simple potential functions for simulating liquid water. *The Journal of*  
957 *Chemical Physics* **79**, 926-935, doi:10.1063/1.445869 (1983).
- 958 55 Maier, J. A. *et al.* ff14SB: Improving the Accuracy of Protein Side Chain and Backbone  
959 Parameters from ff99SB. *J Chem Theory Comput* **11**, 3696-3713,  
960 doi:10.1021/acs.jctc.5b00255 (2015).
- 961 56 Singh, U. C. & Kollman, P. A. An approach to computing electrostatic charges for  
962 molecules. *Journal of Computational Chemistry* **5**, 129-145,  
963 doi:<https://doi.org/10.1002/jcc.540050204> (1984).
- 964 57 Meagher, K. L., Redman, L. T. & Carlson, H. A. Development of polyphosphate  
965 parameters for use with the AMBER force field. *J Comput Chem* **24**, 1016-1025,  
966 doi:10.1002/jcc.10262 (2003).
- 967 58 Allner, O., Nilsson, L. & Villa, A. Magnesium Ion-Water Coordination and Exchange in  
968 Biomolecular Simulations. *J Chem Theory Comput* **8**, 1493-1502, doi:10.1021/ct3000734  
969 (2012).
- 970 59 Joung, I. S. & Cheatham, T. E. Determination of Alkali and Halide Monovalent Ion  
971 Parameters for Use in Explicitly Solvated Biomolecular Simulations. *The Journal of*  
972 *Physical Chemistry B* **112**, 9020-9041, doi:10.1021/jp8001614 (2008).
- 973 60 Case D. A., B. K., Ben-Shalom I. Y., Brozell S. R., Cerutti D. S., Cheatham T.E. III,  
974 Cruzeiro V. W. D., Darden T. A., Duke R. E., Giambasu G., Gilson M. K., Gohlke H.,  
975 Goetz A. W. ,Harris R., Izadi S., Izmailov S. A., Kasavajhala K., Kovalenko A., Krasny  
976 R., Kurtzman T., Lee T. S., LeGrand S., Li P., Lin C., Liu J., Luchko T., Luo R., Man V.,  
977 Merz K M., Miao Y., Mikhailovskii O., Monard G., Nguyen H., Onufriev A., Pan F.,  
978 Pantano S., Qi R., Roe D. R., Roitberg A., Sagui C., Schott-Verdugo S., Shen J.,  
979 Simmerling C., Skrynnikov N. R., Smith J., Swails J., Walker R. C., Wang J., Wilson L.,  
980 Wolf R. M., Wu X., Xiong Y., Xue Y, York D. M., Kollman P.A. AMBER 2020,  
981 University of California, San Francisco. (2020).
- 982 61 Andrea, T. A., Swope, W. C. & Andersen, H. C. The role of long ranged forces in  
983 determining the structure and properties of liquid water. *The Journal of Chemical Physics*  
984 **79**, 4576-4584, doi:10.1063/1.446373 (1983).
- 985 62 Geoghegan, K. F. *et al.* Spontaneous alpha-N-6-phosphogluconoylation of a "His tag" in  
986 *Escherichia coli*: the cause of extra mass of 258 or 178 Da in fusion proteins. *Anal Biochem*  
987 **267**, 169-184, doi:10.1006/abio.1998.2990 (1999).
- 988 63 Trapnell, C., Pachter, L. & Salzberg, S. L. TopHat: discovering splice junctions with RNA-  
989 Seq. *Bioinformatics* **25**, 1105-1111, doi:10.1093/bioinformatics/btp120 (2009).
- 990 64 Trapnell, C. *et al.* Transcript assembly and quantification by RNA-Seq reveals unannotated  
991 transcripts and isoform switching during cell differentiation. *Nat Biotechnol* **28**, 511-515,  
992 doi:10.1038/nbt.1621 (2010).



- 993 65 Kim, D., Paggi, J. M., Park, C., Bennett, C. & Salzberg, S. L. Graph-based genome  
994 alignment and genotyping with HISAT2 and HISAT-genotype. *Nat Biotechnol* **37**, 907-  
995 915, doi:10.1038/s41587-019-0201-4 (2019).
- 996 66 Kluin, R. J. C. *et al.* XenofilteR: computational deconvolution of mouse and human reads  
997 in tumor xenograft sequence data. *BMC Bioinformatics* **19**, 366, doi:10.1186/s12859-018-  
998 2353-5 (2018).
- 999 67 Love, M. I., Huber, W. & Anders, S. Moderated estimation of fold change and dispersion  
1000 for RNA-seq data with DESeq2. *Genome Biol* **15**, 550, doi:10.1186/s13059-014-0550-8  
1001 (2014).
- 1002 68 Szklarczyk, D. *et al.* STRING v11: protein-protein association networks with increased  
1003 coverage, supporting functional discovery in genome-wide experimental datasets. *Nucleic*  
1004 *Acids Res* **47**, D607-D613, doi:10.1093/nar/gky1131 (2019).
- 1005 69 Dennis, G., Jr. *et al.* DAVID: Database for Annotation, Visualization, and Integrated  
1006 Discovery. *Genome Biol* **4**, P3 (2003).
- 1007 70 Bagci, H. *et al.* Mapping the proximity interaction network of the Rho-family GTPases  
1008 reveals signalling pathways and regulatory mechanisms. *Nat Cell Biol* **22**, 120-134,  
1009 doi:10.1038/s41556-019-0438-7 (2020).
- 1010 71 Ziman, M., O'Brien, J. M., Ouellette, L. A., Church, W. R. & Johnson, D. I. Mutational  
1011 analysis of CDC42Sc, a *Saccharomyces cerevisiae* gene that encodes a putative GTP-  
1012 binding protein involved in the control of cell polarity. *Mol Cell Biol* **11**, 3537-3544,  
1013 doi:10.1128/mcb.11.7.3537-3544.1991 (1991).
- 1014 72 Vignal, E. *et al.* Characterization of TCL, a new GTPase of the rho family related to TC10  
1015 and Cdc42. *J Biol Chem* **275**, 36457-36464, doi:10.1074/jbc.M003487200 (2000).  
1016

# Figure 1

**A**

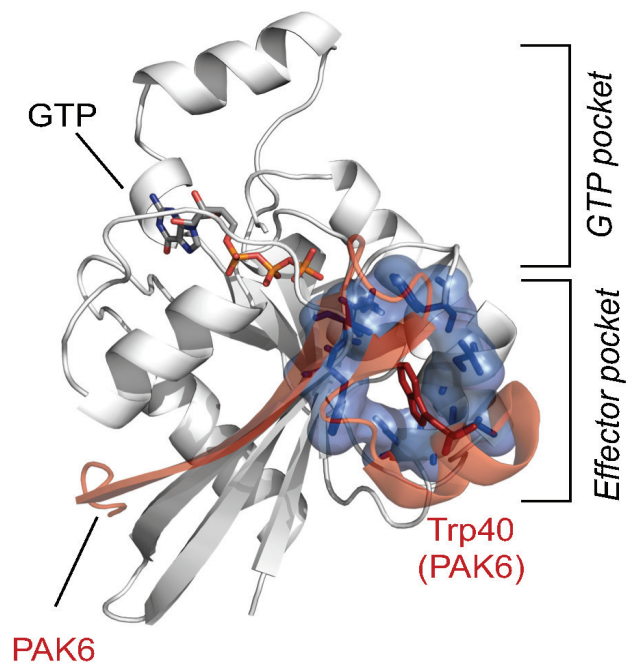

**B**

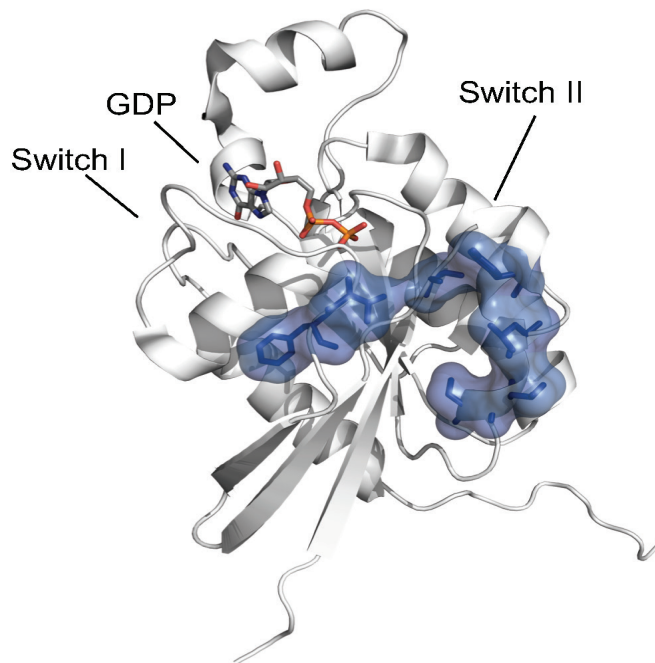

**C**

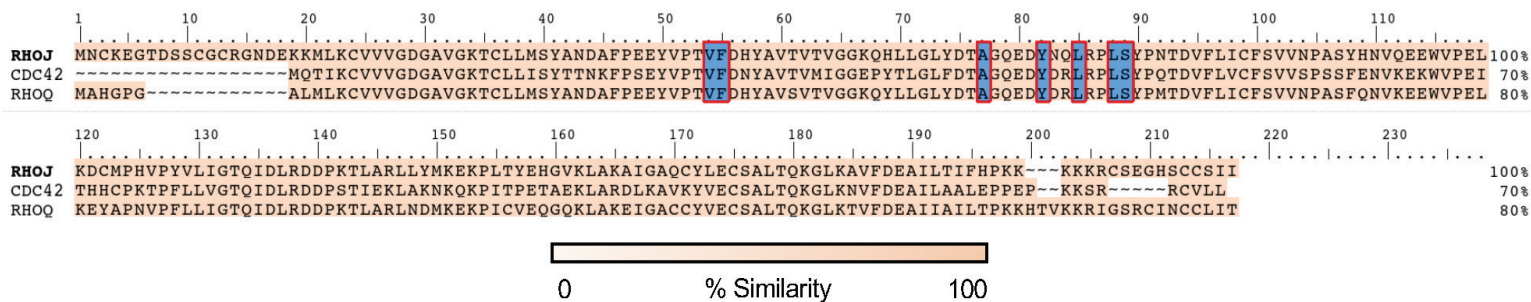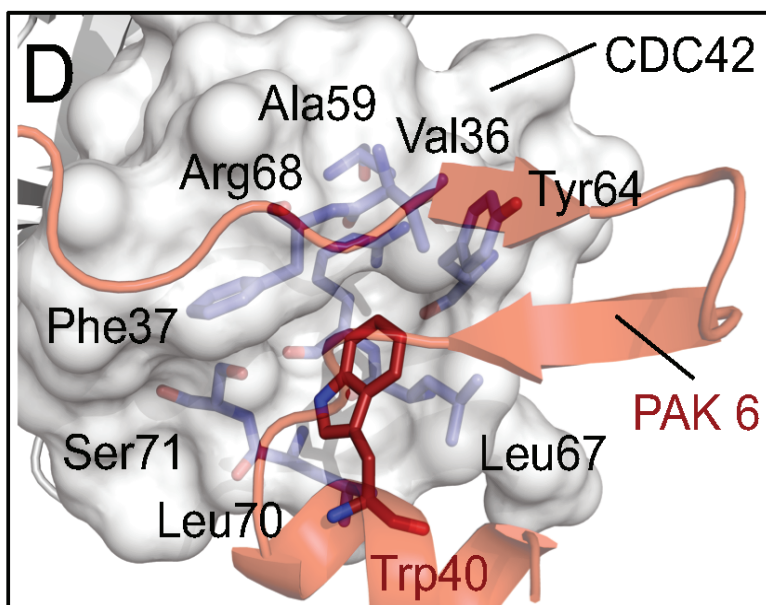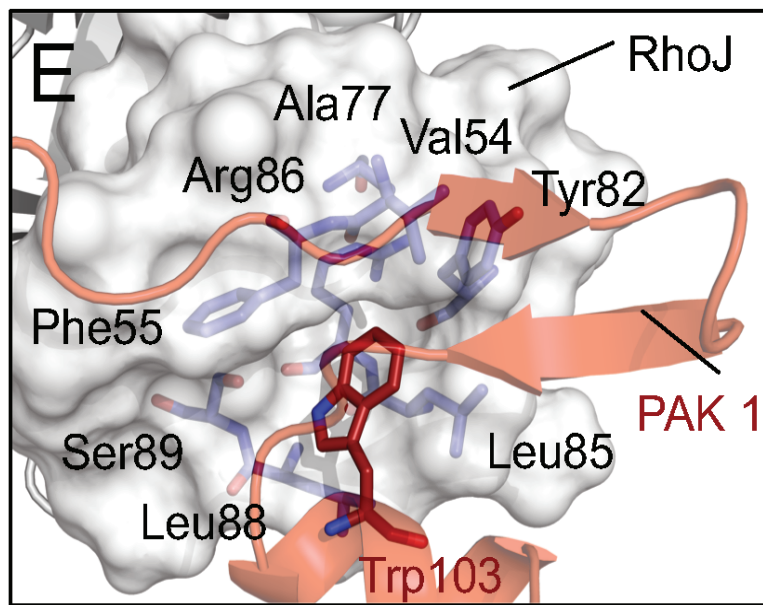

**Figure 1: Characterization of a RHOJ/CDC42 allosteric drug binding pocket located at the effector interaction interface. A)** GTP-bound state of the effector pocket (blue) interacting with Trp40 (red) of PAK6 - PDBid 2ODB. **B)** Unfolded conformation of the effector pocket in the GDP-bound state - PDBid: 1DOA. **C)** Amino acid sequences alignment of RHOJ, CDC42 and RHOQ. The residues defining the drug binding pocket are highlighted in blue. **D)** Close-up view of the CDC42-PAK6 interaction interface. Interactions between Trp40 (red) of PAK6 (transparent red) and the effector binding pocket (light blue) of CDC42 (grey) are shown. **E)** Close-up view of the RHOJ-PAK1 interaction interface. For comparison, modeling of the interaction between Trp103 (red) of PAK1 (transparent red) and the effector binding pocket (light blue) of RHOJ (grey) is shown.

# Figure 2

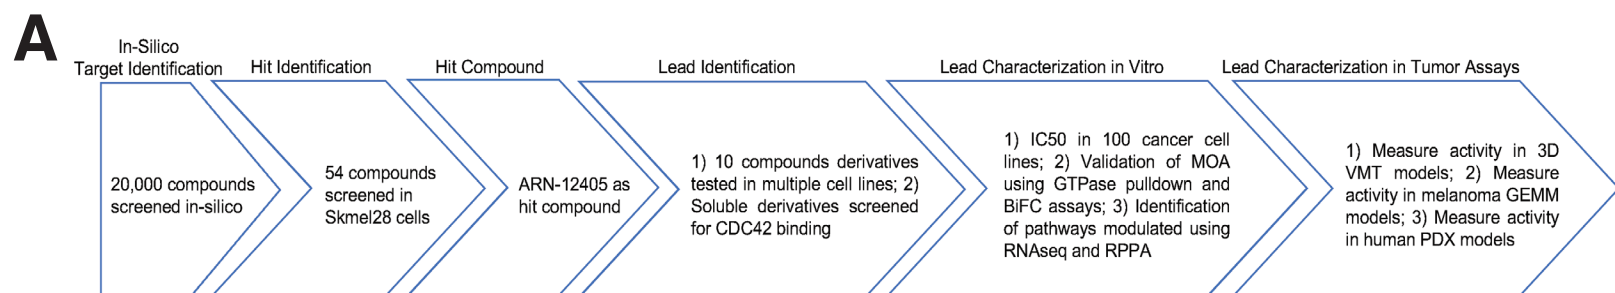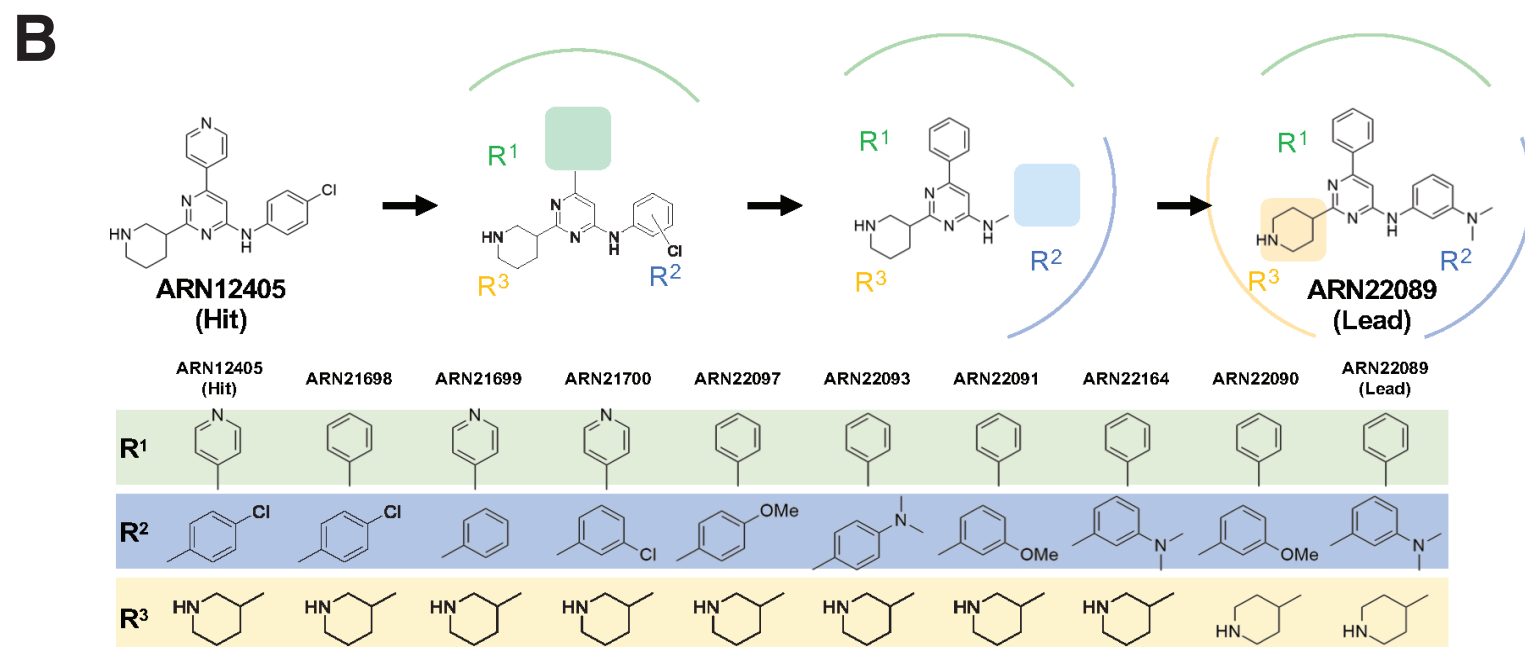

**C**

|           | SKM28 (μM) | R Squared | WM3248 (μM) | R Squared | SkmeI3 (μM) | R Squared | A375 (μM) | R Squared | SW480 (μM) | R Squared | S kinetic (μM) | t1/2 Plasma (min) | t1/2 Microsomes (min) |
|-----------|------------|-----------|-------------|-----------|-------------|-----------|-----------|-----------|------------|-----------|----------------|-------------------|-----------------------|
| ARN-12405 | 16.37      | 0.9936    | 14.38       | 0.9633    | 13.47       | 0.9947    | 15.27     | 0.9786    | 14.8       | 0.9698    | 222±6          | >120              | 48                    |
| ARN-21698 | 10.21      | 0.9112    | 8.423       | 0.939     | 6.3         | 0.9844    | 10.94     | 0.9872    | 11.91      | 0.9866    | <1             | >120              | 46                    |
| ARN-21699 | ND         | ND        | 23.08       | 0.4995    | 26.87       | 0.9331    | 22.47     | 0.4555    | 26.78      | 0.5829    | NA             | NA                | NA                    |
| ARN-21700 | 38.31      | 0.9711    | 30.85       | 0.9688    | 10.24       | 0.9768    | 11.33     | 0.9754    | 25.28      | 0.9612    | NA             | NA                | NA                    |
| ARN-22097 | >50        | 0.9793    | 27.53       | 0.9881    | 13.27       | 0.9264    | 22.94     | 0.9398    | 25.04      | 0.9858    | NA             | NA                | NA                    |
| ARN-22093 | 45.02      | 0.9937    | 12.76       | 0.9478    | 11.84       | 0.9019    | 13.14     | 0.9761    | 17.66      | 0.9752    | 246±2          | >120              | 43                    |
| ARN-22091 | 24.2       | 0.9664    | 11.28       | 0.9932    | 11.77       | 0.9685    | 12.52     | 0.963     | 17.75      | 0.9933    | 237±1          | >120              | 21                    |
| ARN-22164 | 31.4       | 0.9794    | 10.97       | 0.9441    | 8.138       | 0.9174    | 14.61     | 0.9741    | 11.4       | 0.9961    | >250           | 119±12            | 20                    |
| ARN-22090 | 38.12      | 0.9432    | 9.468       | 0.9478    | 4.588       | 0.9776    | 9.787     | 0.9941    | 10.49      | 0.9824    | >250           | >120              | 27                    |
| ARN-22089 | 24.8       | 0.9936    | 4.523       | 0.9951    | 4.257       | 0.9512    | 4.92      | 0.9521    | 8.608      | 0.986     | 250±4          | 71                | 27                    |

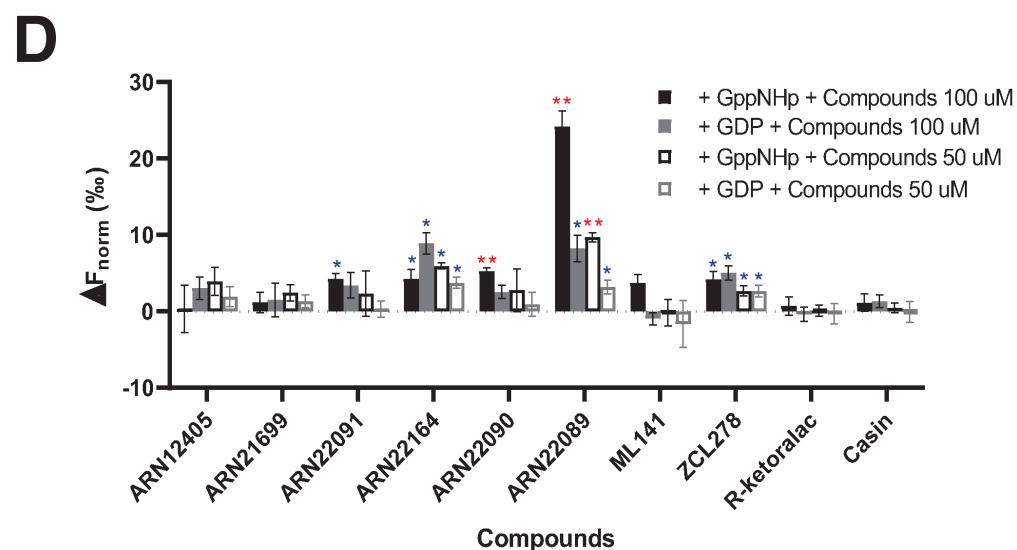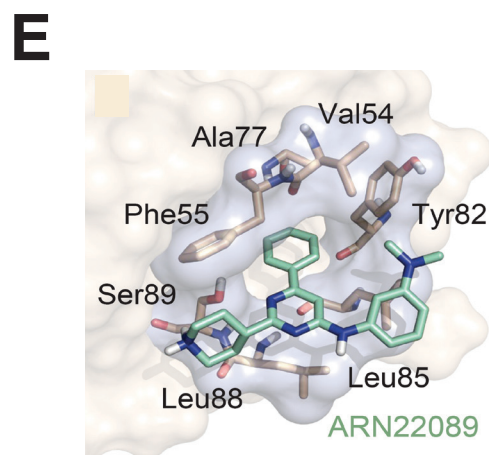

**Figure 2: Structure-based screening identifies RHOJ/CDC42 allosteric inhibitors.** **A)** Flow diagram of the screening steps to identify RHOJ/CDC42 allosteric inhibitors. **B)** Chemical structures of the hit and synthesized derivatives. Names of the compounds and structures of the indicated R side chains are denoted below. **C)** Table of IC<sub>50</sub>s, solubilities, and plasma and mouse microsomal half-life of lead and synthesized derivatives. Detailed IC<sub>50</sub> curves are shown in **Figure S2A**. **D)** MST was used to screen for binding of the hit, derivatives, and known CDC42 inhibitors to a His-tagged CDC42 fragment. The graph displays the difference in normalized fluorescence ( $\Delta F_{\text{norm}} [\%] = \Delta F_{\text{hot}}/F_{\text{cold}}$ ) at 1.5-2.5 sec between protein:compound sample and a protein only sample at the indicated drug concentrations after loading with the indicated nucleotides. A single asterisk highlights binding with signal to noise ratio equal or higher than 5. Double asterisks are used for binding with signal to noise ratio higher than 12. **E)** Model structure of lead compound bound to the allosteric drug binding pocket of CDC42/RHOJ.

# Figure 3

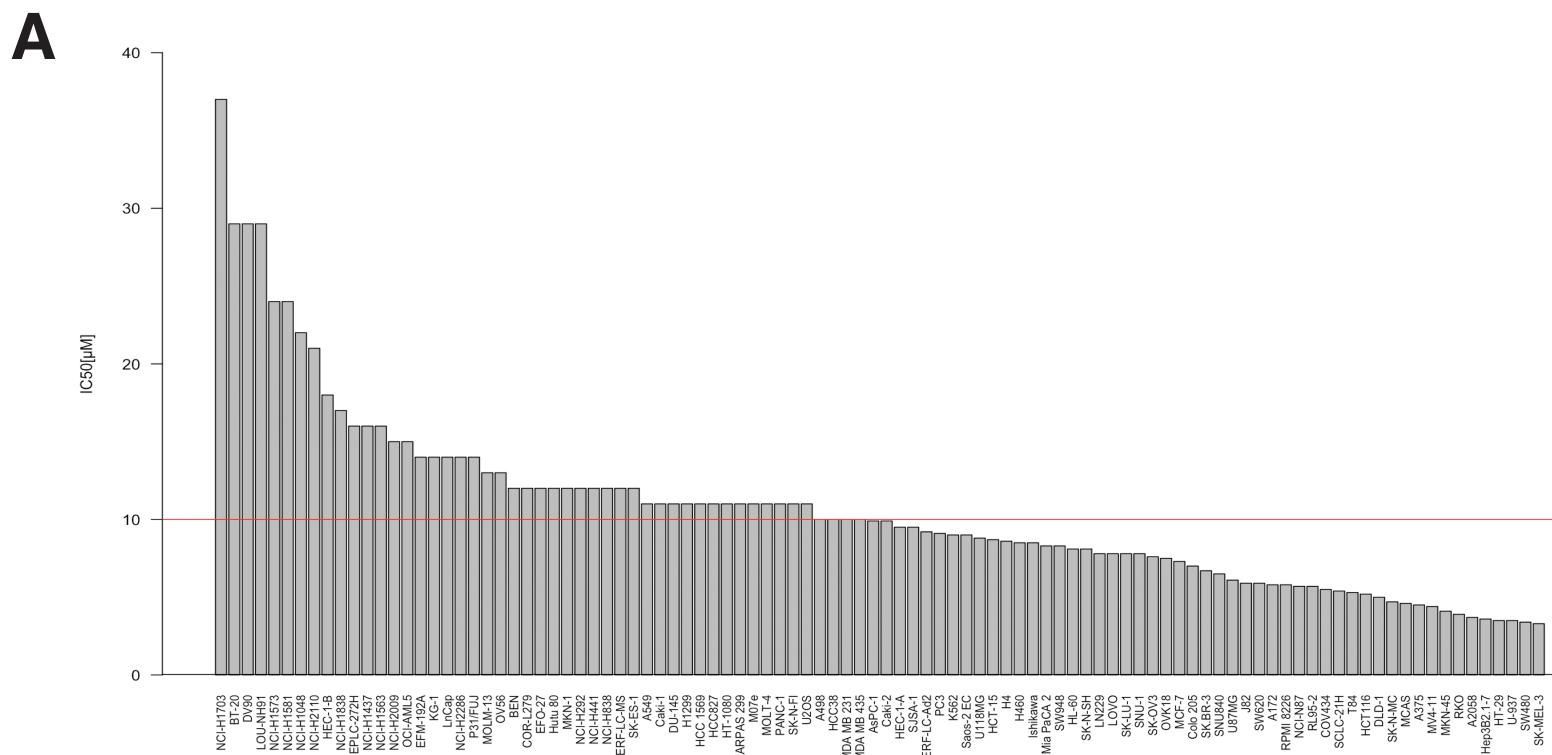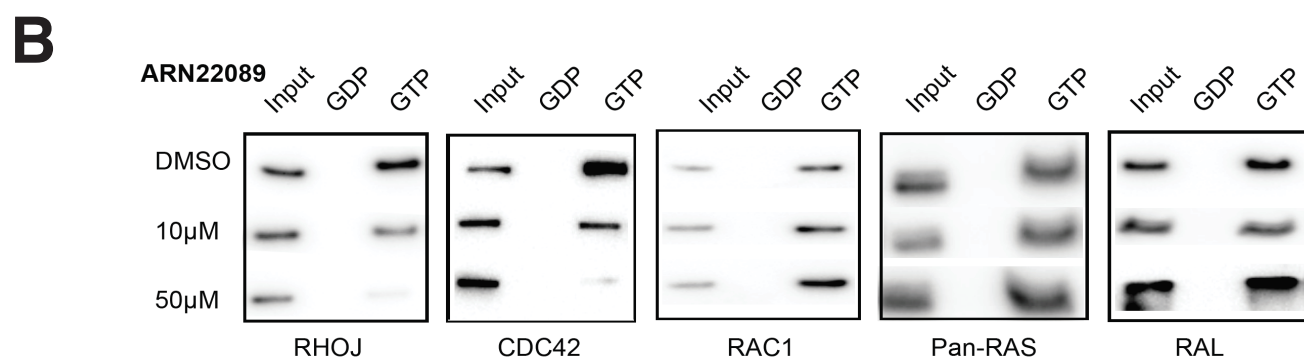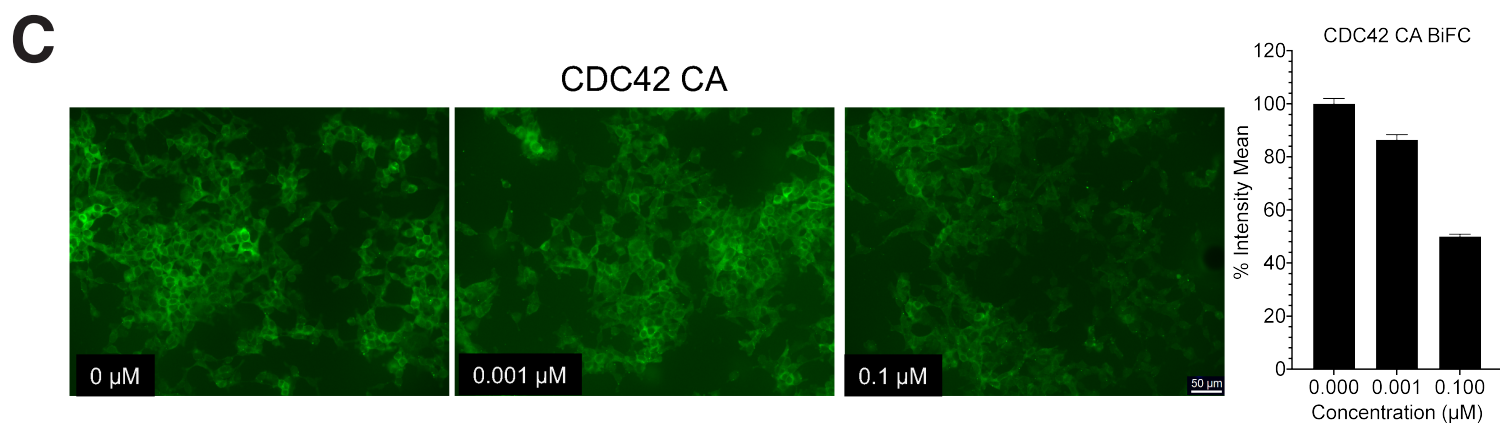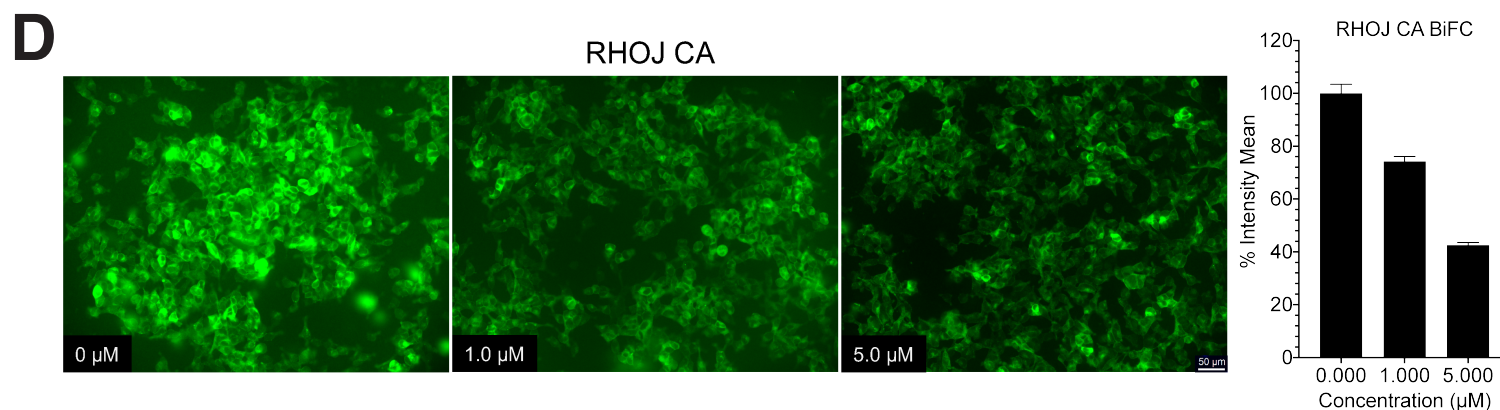

**Figure 3: ARN22089 has broad spectrum anti-cancer activity and selectively blocks RHOJ/CDC42 effector interactions.** **A)** Bar graph shows IC<sub>50</sub> values of ARN22089 in 100 cancer cell lines. **B)** ARN22089 selectively blocks CDC42 effector interactions. WM3248 cells were treated with ARN22089 for 24 hours and lysates were subjected to pulldown assays with PAK1 and RAF1 to measure the ability of the compound to block RHOJ, CDC42, RAC1, RAS, or RAL effector interactions. **(C)** CDC42 and **(D)** RHOJ BiFC cells were treated with 2 µg/mL of DOX to induce CDC42/RHOJ and PAK1 expression and treated with the indicated doses of ARN22089 for 24 and 8 h, respectively. Bar graphs, far right for **(C)** and **(D)**, show mean percent GFP intensity for each condition. The 0 µM condition was set to 100%. No DOX condition was used for background subtraction.

# Figure 4

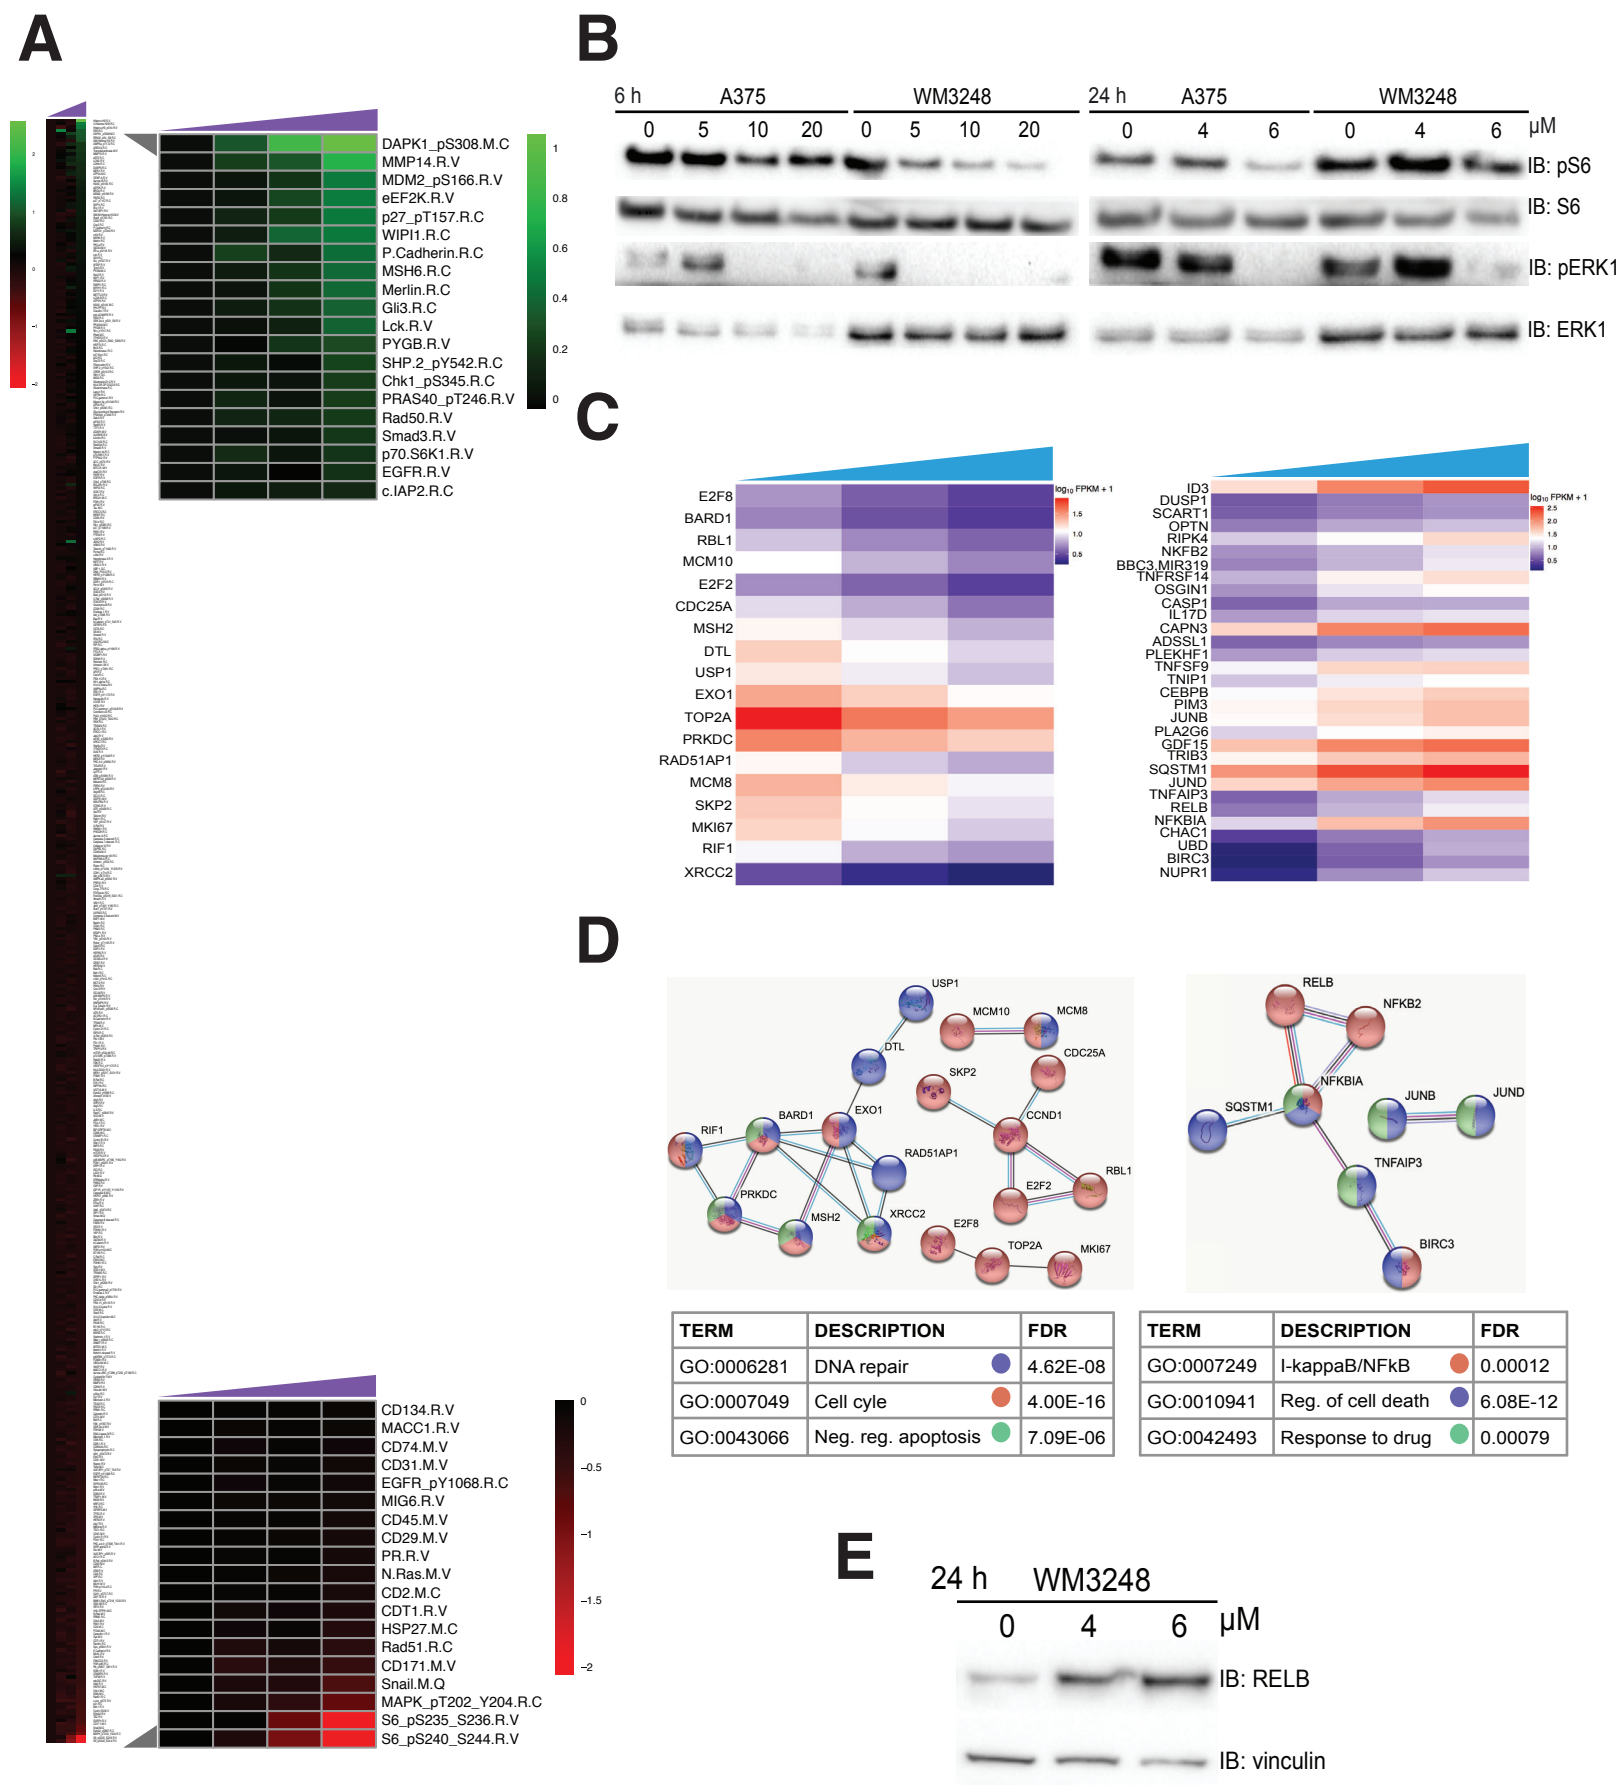



**Figure 4: Characterization of the activity of ARN22089 in melanoma cells.** **A)** RPPA heatmap showing effects of drug treatment on protein accumulation/phosphorylation. Colors represents values of each treated dose normalized to vehicle (0  $\mu$ M) (see **Table S6**). Left, heatmap shows results for 486 proteins assayed. Right, insets include proteins that were significantly modulated by drug treatment (see **Table S7**). **B)** WM3248 or A375 cells were treated with the indicated doses of ARN22089 and the accumulation of pS6 and pERK (targets significantly modulated in the RPPA analysis) were measured by immunoblotting. **C)** Profile heatmaps of mRNA sequences that were differentially transcribed after drug treatment (cutoff q-value < 0.05, **Table S8**). **D)** Protein-protein interactions networks modulated by drug treatment. Significant genes shown in **(C)** were subjected to STRING analysis to identify protein-protein interaction networks. Nodes are color coded based on Gene ontology analysis shown in the table below. **E)** Immunoblot for RELB from WM3248 cells that were treated with the indicated doses of ARN22089 for 24 h.

# Figure 5

**A**

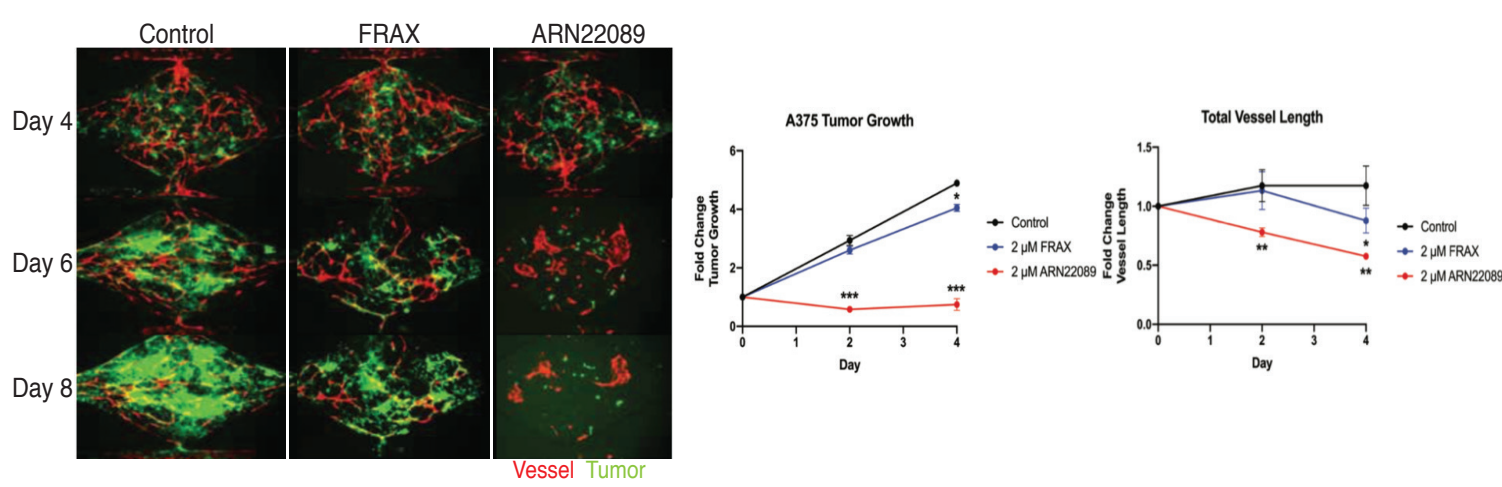

**B**

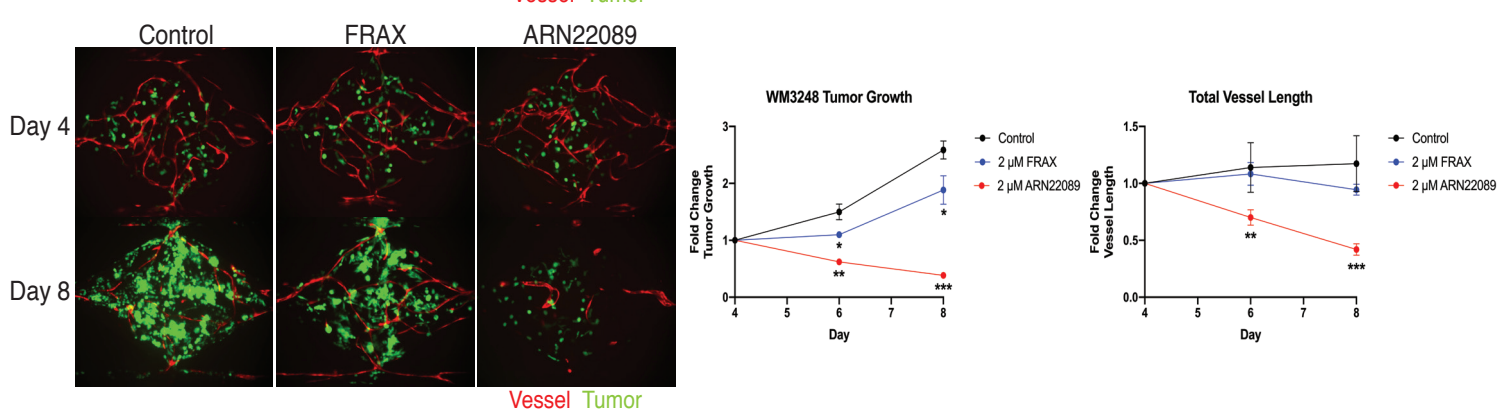

**C**

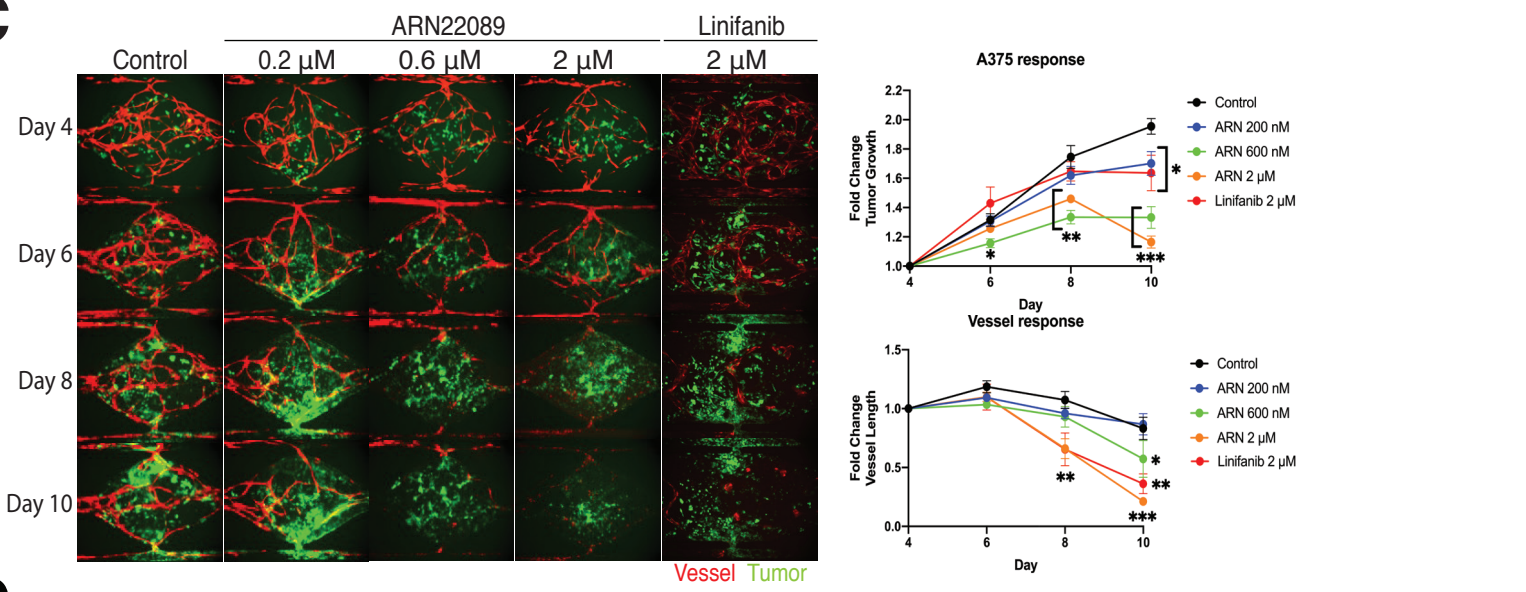

**D**

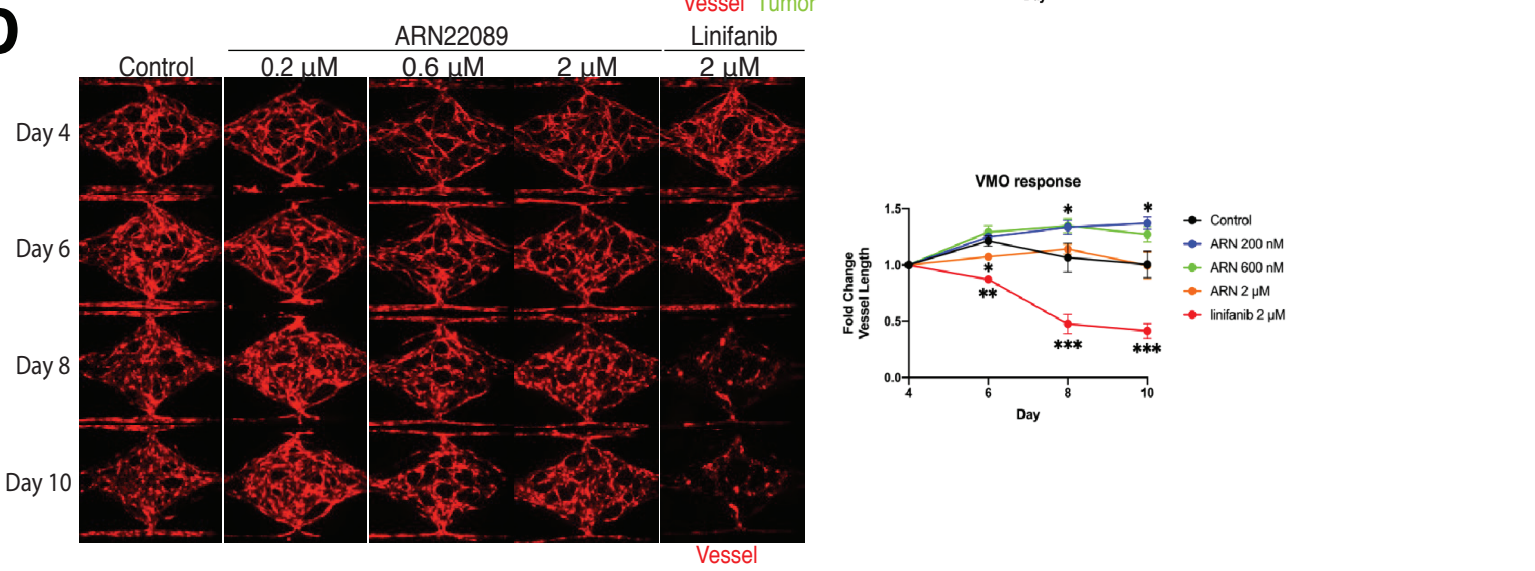

**Figure 5: ARN22089 inhibits tumor growth in a Vascularized Microtumor (VMT) model.** Representative micrographs of **(A)** A375 or **(B)** WM3248 VMTs (organoids that contain cancer cells and endothelial cells) treated with control, 2  $\mu$ M FRAX or ARN22089. Quantification of tumor cell growth and vessel length shown on right. **(C)** Micrographs VMT of WM3248 treated with increasing concentration of ARN22089, corresponding quantification shown on right. The angiogenesis inhibitor Linifanib at 2  $\mu$ M is shown as a comparison. **(D)** Micrographs of VMOs (organoids with only endothelial cells) treated with increasing concentrations of ARN22089 or Linifanib and corresponding quantification of vessel length is shown.

# Figure 6

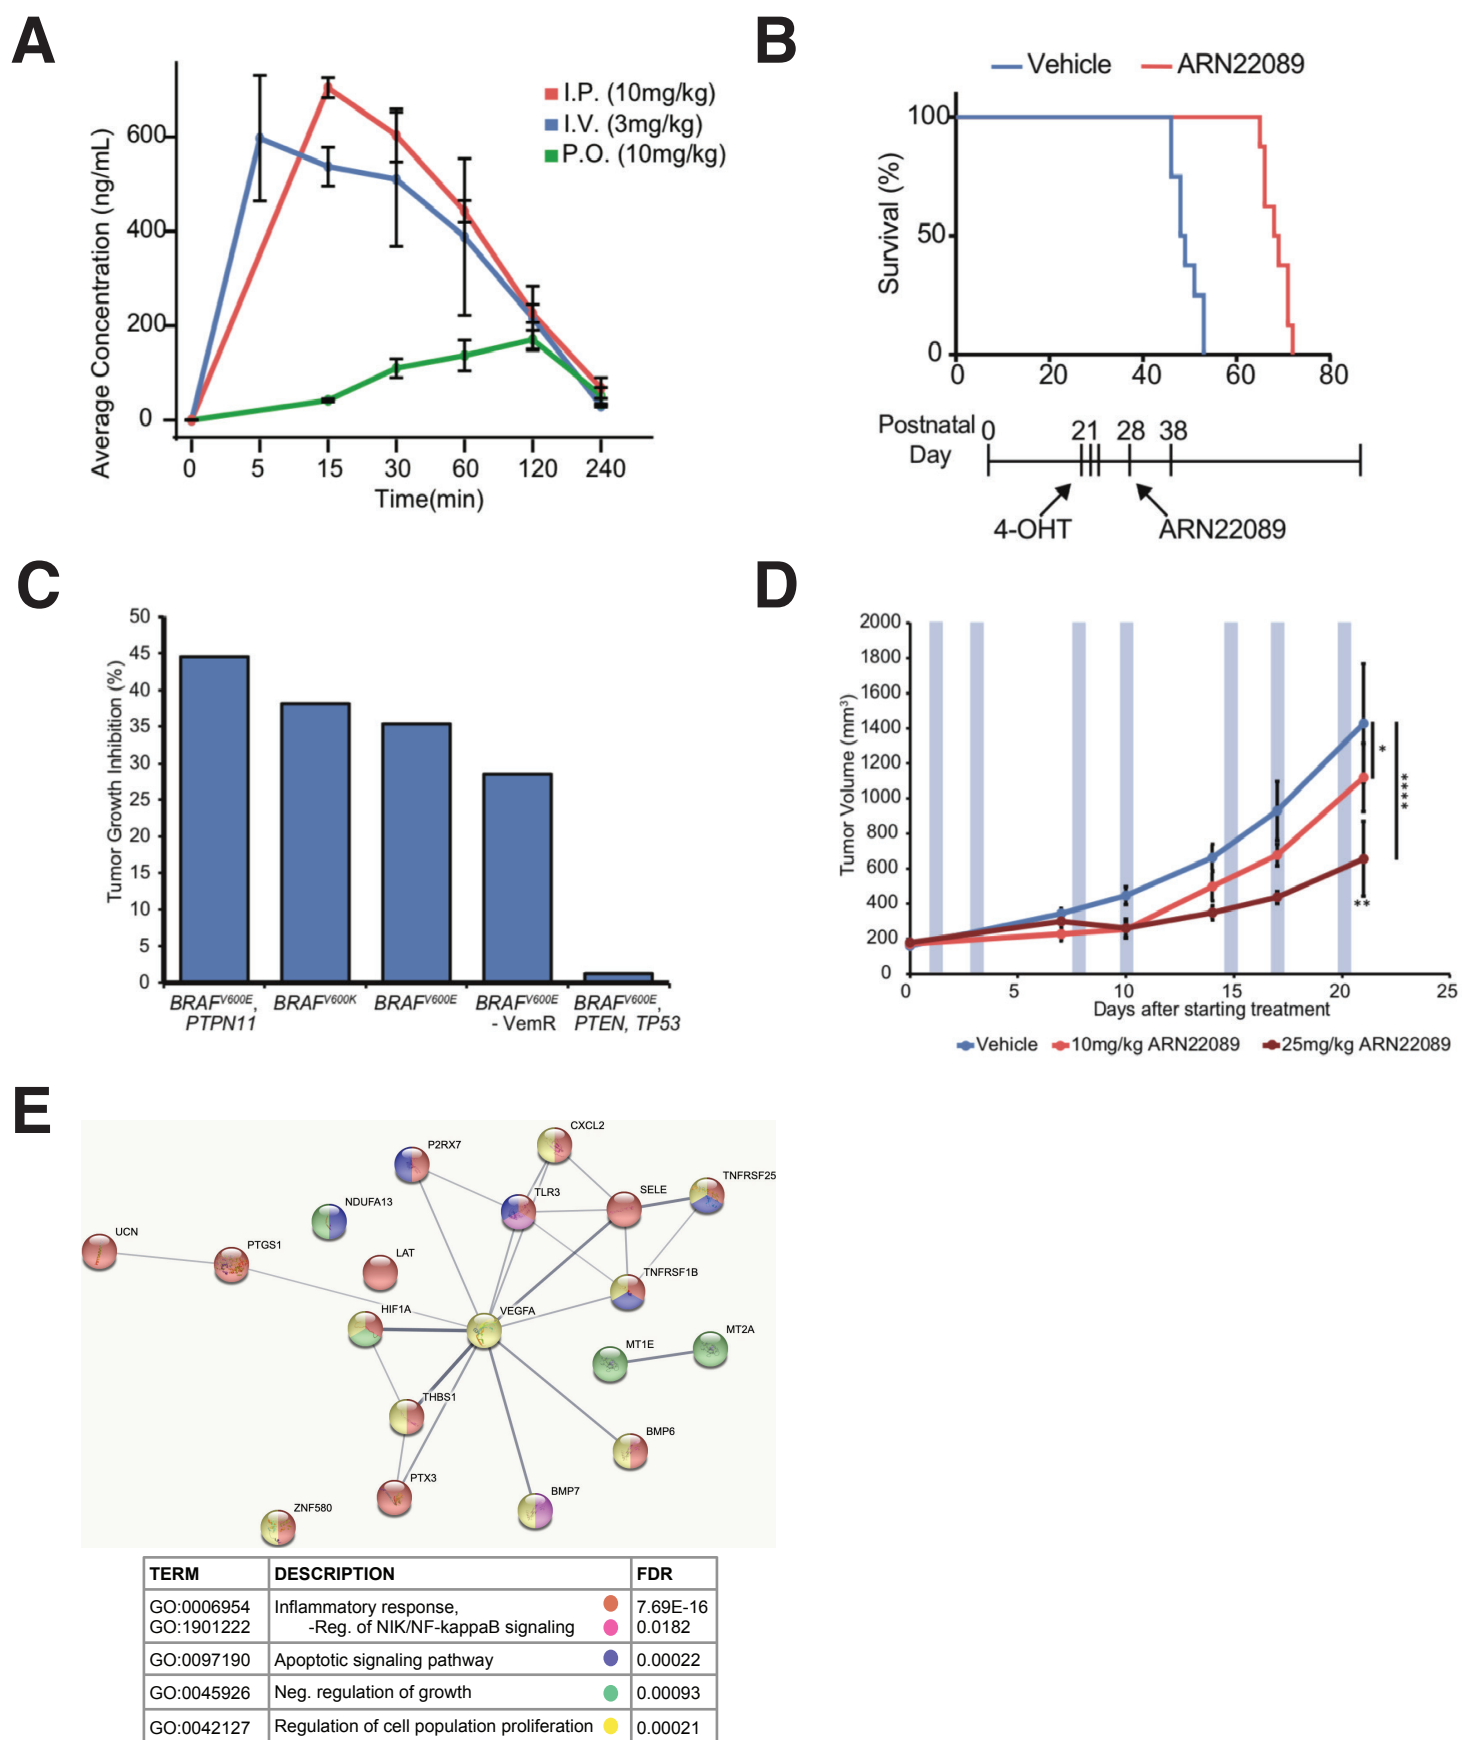

**Figure 6. ARN22089 inhibits tumor growth in mouse models.** **A)** ARN22089 delivered at 10mg/kg I.P. and 3mg/kg I.V. has drug like properties. PK of compounds was calculated as described in the methods. Complete data is shown in Fig S5F. **B)** ARN22089 inhibits melanoma development in a murine *BRAF*<sup>V600E</sup>, *PTEN*<sup>fllox/fllox</sup>, *Tyr:Cre*<sup>ERT2</sup> model. Melanoma was induced at P21-23 with topical treatment of 25mg/mL 4-OHT. Mice were then treated with vehicle (blue) or 10mg/kg I.P. ARN22089 (red) for 10 days between P28 -P38. **C)** ARN22089 inhibits tumor growth in *BRAF* mutant PDX tumor models (listed by verified mutations). Mice were treated for 14 days with 10mg/kg I.P. ARN22089 starting when PDX tumors reached 150-200mm<sup>3</sup>. Tumor growth inhibition was compared with matched vehicle treated mice (see also Figure S6A,B). **D)** ARN22089 inhibits tumor growth in a dose responsive manner. *BRAF*<sup>V600E</sup>, *PTPN11* PDX tumors were treated with vehicle (blue), 10mg/kg ARN22089 (light red), or 25mg/kg ARN22089 (dark red) twice weekly after tumors reached 150-200mm<sup>3</sup>, blue shaded boxes denote I.V. treatments (see also **Figure S5**). **E)** RNA from the tumors described in **(D)** were sequenced. STRING was used to identify differentially expressed protein-protein interaction networks. Nodes are color coded based on Gene Ontology indicated in the table below.
